1 **Analysis of historical selection in winter wheat**

2 Chin Jian Yang\*

3 Olufunmilayo Ladejobi†

4 Richard Mott†

5 Wayne Powell\*

6 Ian Mackay\*‡

7 \*Scotland's Rural College (SRUC), Kings Buildings, West Mains Road, Edinburgh, EH9 3JG,  
8 UK.

9 †Department of Genetics, Evolution & Environment, University College London, London, WC1E  
10 6BT

11 ‡IMPlant Consultancy Ltd., Chelmsford, UK.

12 Corresponding author: Ian Mackay, [ian.mackay@sruc.ac.uk](mailto:ian.mackay@sruc.ac.uk)

13

14 **Abstract**

15 Winter wheat is a major crop with a rich selection history in the modern era of crop breeding.  
16 Genetic gains across economically important traits like yield have been well characterized and  
17 are the major force driving its production. Winter wheat is also an excellent model for analyzing  
18 historical genetic selection. As a proof of concept, we analyze two major collections of winter  
19 wheat varieties that were bred in western Europe from 1916 to 2010, namely the Triticeae  
20 Genome (TG) and WAGTAIL panels, which include 333 and 403 varieties respectively. We  
21 develop and apply a selection mapping approach, Regression of Alleles on Years (RALLY), in  
22 these panels, as well as in simulated populations. RALLY maps loci under sustained historical  
23 selection by using a simple logistic model to regress allele counts on years of variety release.  
24 To control for drift-induced allele frequency change, we develop a hybrid approach of genomic  
25 control and delta control. Within the TG panel, we identify 22 significant RALLY quantitative  
26 selection loci (QSLs) and estimate the local heritabilities for 12 traits across these QSLs. By  
27 correlating predicted marker effects with RALLY regression estimates, we show that alleles  
28 whose frequencies have increased over time are heavily biased towards conferring positive  
29 yield effect, but negative effects in flowering time, lodging, plant height and grain protein  
30 content. Altogether, our results (1) demonstrate the use of RALLY to identify selected genomic  
31 regions while controlling for drift, and (2) reveal key patterns in the historical selection in winter  
32 wheat and guide its future breeding.

33

34 **Key Message**

35 Modelling of the distribution of allele frequency over year of variety release identifies major loci  
36 involved in historical breeding of winter wheat.

37 **Keywords**

38 RALLY, allele regression, genomic control, selection mapping, genetic gain

39

40 **Introduction**

41 Modern agriculture benefits from long standing breeding effort in creating new and  
42 improved crop varieties over time. Genetic gain is often used as a measure of the success in  
43 breeding for trait improvement. For example, in wheat, the genetic gains in yield and other  
44 agriculturally valuable traits have been well quantified (Mackay et al. 2011, Tadesse et al. 2019  
45 and Shorinola et al. 2021). The introduction of genomic selection (GS) (Meuwissen et al. 2001)  
46 in breeding program further shortens breeding cycles, improves selection accuracy and  
47 intensity, and accelerates genetic gain (Voss-Fels et al. 2019). Lastly, genetic gain is further  
48 increased by the rise of knowledge exchange between plant and animal breeding through GS  
49 (Hickey et al. 2017).

50 In recent years, there has been a growing interest in mapping quantitative selection loci  
51 (QSLs) that are associated with genetic gain independently of any phenotype. The mapping  
52 approach typically involves correlating continuous variables, such as year of variety release and  
53 geographical parameters, to genomic markers in a historical variety dataset. Conceptually, it is  
54 similar to selection mapping which tests for selection signatures among genomic markers using  
55 population genetic models (Johnsson 2018). This approach has been variously named as Birth  
56 Date Selection Mapping (Decker et al. 2012), Generation Proxy Selection Mapping (Rowan et  
57 al. 2021) and EnvGWAS (Li et al. 2020, Sharma et al. 2021). Here, we will refer to it as  
58 EnvGWAS because the underlying mixed linear model is no different from a conventional  
59 genome-wide association study (GWAS).

60 Related to EnvGWAS, EigenGWAS uses eigenvectors (principal components) as the  
61 dependent variable in a mixed linear model (Li et al. 2020, Sharma et al. 2021). The  
62 EigenGWAS approach may yield similar results to EnvGWAS if the dependent variables in  
63 EnvGWAS are correlated strongly with any eigenvector. Otherwise, EigenGWAS may identify  
64 additional QSLs where it incorporates variables that have not been quantified directly. A key  
65 confounding factor for determining whether a locus has been under sustained historical  
66 selection or drift is that varieties are linked by a complex historical pedigree and unequal  
67 relatedness. By correcting for population structure using a mixed linear model (Yu et al. 2006),  
68 year effects and principal components that are associated with drift can be controlled in  
69 EnvGWAS and EigenGWAS respectively.

70 Here, we introduce a new application of an old method by modelling allele frequency  
71 change over years in a historical variety dataset. This method, termed Regression of Alleles on  
72 Years (RALLY), fits a logistic regression to model the allele count as a dependent variable and  
73 the year of variety release as an independent variable. A logistic model is commonly used in  
74 case-control studies where the dependent variables are binary traits of whether an individual is  
75 diseased and the independent variables are test factors (Prentice and Pyke 1979). A logistic  
76 model is appropriate because changes in allele frequencies are small when the starting  
77 frequencies are near the extrema, and large when they are intermediate. In addition, the model  
78 is bounded asymptotically by 0 and 1. The dependent and independent variables are switched  
79 between RALLY and EnvGWAS. Instead of estimating the mean of years of release for each  
80 allele in EnvGWAS, RALLY estimates the mean of allele counts for each year, which is  
81 equivalent to the allele frequency for a given year. Recently, Looseley et al. (2020) applied a  
82 similar approach to RALLY on significant GWAS markers in a historical barley variety dataset.  
83 RALLY is a genome-wide approach that employs parametric control (PC) as a correction to drift-  
84 induced allele frequency change. PC is a novel hybrid approach of genomic control (GC) (Devlin

85 and Roeder 1999) and delta control (DC) (Gorroochurn et al. 2006), which are two common  
86 control approaches against population structure in human GWAS studies without the need for  
87 mixed linear model.

88 Our analyses in the simulated and historical variety datasets demonstrate the usefulness  
89 of RALLY in mapping QSLs. We begin the evaluation of RALLY in simulated populations where  
90 the truth is known, both with and without selection, to quantify RALLY detection power and limit.  
91 We use the simulations to calibrate PC, which is then applied to the two historical winter wheat  
92 datasets, namely the panels of Triticeae Genome (TG) (Bentley et al. 2014) and Wheat  
93 Association Genetics for Trait Advancement and Improvement of Lineages (WAGTAIL)  
94 (Fradgley et al. 2019). The WAGTAIL panel is used only as a replicate RALLY analysis. Within  
95 the TG panel, we identify 22 RALLY QSLs and compare them to the GWAS QTLs from Ladejobi  
96 et al. (2019). Some notable QSLs include one in 2B which coincides with *Ppd-B1* (Mohler et al.  
97 2004), *Yr7/Yr5/YrSP* (Marchal et al. 2018) and alien introgression from *Triticum timopheevii*  
98 (Tsilo et al. 2008, Martynov et al. 2018), as well as another in 6A that coincides with *TaGW2* (Su  
99 et al. 2011), *Rht24* (Würschum et al. 2017) and *Rht25* (Mo et al. 2018). To further support the  
100 RALLY QSLs, we show that all 22 QSLs have non-zero local heritabilities for at least one trait.  
101 Next, we find clear directional selection in traits like flowering time, lodging, yield, plant height  
102 and grain protein content by comparing the signs of predicted marker allele effects with their  
103 directions of allele frequency change as given by RALLY. By extending the results to pairs of  
104 traits, we identify the selection priorities. For example, more ears with lighter grains have been  
105 preferred over fewer ears with heavier grains. Finally, we employ the multivariate breeder's  
106 equation (Lande and Arnold 1983) to estimate selection parameters, although our results  
107 suggest a limited use in modern crops, in contrast to its original application in evolutionary  
108 studies. Overall, we have shown that many major genomic regions have been extensively used

109 in winter wheat breeding and we suggest that future selection should emphasize on improving  
110 other unexplored genomic regions.

111

## 112 **Materials and Methods**

### 113 **Population simulation with and without selection**

114 We initiated our population simulation in a fictitious species with 10 chromosomes  
115 ([Figure 1](#)). The genetic lengths of the chromosomes were set from 100 to 280 centiMorgans  
116 (cM) with an increment of 20 cM in subsequent chromosomes. The populations spanned over  
117 50 generations (years) with and without selection. All the simulations were performed using the  
118 “AlphaSimR” package (Gaynor et al. 2021) in R (R Core Team 2021). We first created 32 inbred  
119 founders using the *runMac*s function and we placed one marker (segregating site) at every 0.1  
120 cM. Two causal quantitative trait loci (QTLs) were chosen randomly from the markers at each  
121 frequency ranging from 1/32 to 16/32, which resulted in 32 QTLs. The QTL effects were drawn  
122 from an approximately negative binomial distribution such that the rarer QTL alleles have larger  
123 effects than the more common QTL alleles ([Figure 1](#)). We standardized the QTL effects such  
124 that the total variance of additive genetic or QTL effects is 1. Phenotypic values for each line  
125 were set as a sum of QTL effects and residual effects drawn from a normal distribution of mean  
126 0 and variance 1, which is equivalent to a heritability of 0.5.

127 We created selected (S) and unselected (U) populations from the 32 founders using a  
128 simplified model that mimics new variety breeding of major crops in Europe. All varieties were  
129 derived as F<sub>6</sub> recombinant inbred lines (RILs) from bi-parental crosses. This is equivalent to 4  
130 generations of single seed descent (SSD) from an F<sub>2</sub> population. The first 10 generations were  
131 created by crossing the initial 32 founders at random. In the subsequent generations, we  
132 randomly sampled 32 parents from 6 to 10 generations ago and created 16 bi-parental

133 populations with each having 100 F<sub>6</sub> RILs. By keeping 2 RILs per bi-parental population, we  
134 maintained 32 lines at each generation. The 2 RILs were chosen either from the two highest  
135 phenotypic values (selected) or randomly (unselected). This step was repeated until the  
136 population underwent 55 generations of phenotypic selection. The first 15 generations were  
137 discarded as burn-in because none of the parents of the individuals from these 15 generations  
138 have been selected, and hence there is no selection-induced allele frequency change. In our  
139 simplistic modelling of the plant variety rights (PVRs) system where only a fraction of new lines  
140 passing the PVR test, we randomly sampled and retained 8 lines per generation for a total of  
141 400 lines that spanned over 50 generations. The simulated populations with and without  
142 selection were used in subsequent analyses.

143

#### 144 **RALLY and GWAS in simulated populations**

145 We compared the performances of Regression of Alleles on Years (RALLY) and  
146 Genome Wide Association Study (GWAS) when applied to the selected and unselected  
147 populations. The model for RALLY was fitted in a logistic regression using the *glm* function in R  
148 (R Core Team 2021). The model for GWAS was fitted in a mixed linear model using the  
149 *GWASpoly* function in the “GWASpoly” R package (Rosyara et al. 2016).

150 Briefly, the logistic regression model for RALLY can be shown as below:

$$151 \quad z_i = \frac{1}{1 + e^{-(\mu_{RALLY} + \beta_{RALLY,year} X_{year} + \varepsilon_{RALLY})}} \quad \text{[Equation 1]}$$

152 Or, alternatively, the logistic regression model can be rewritten in a linear form as:

$$153 \quad \ln\left(\frac{z_i}{1-z_i}\right) = \mu_{RALLY} + \beta_{RALLY,year} X_{year} + \varepsilon_{RALLY} \quad \text{[Equation 2]}$$

154 Where the model terms are described as below:

155  $z_i$  is a binary variable indicating the absence (0) or presence (1) of an allele at marker  $i$  in  $n$   
156 lines.

157  $\mu_{RALLY}$  is the mean allele frequency in the first year, or  $y$ -intercept.

158  $\beta_{RALLY,year}$  is the fixed year effect, or regression coefficient of the year variable.

159  $X_{year}$  is the year variable.

160  $\varepsilon_{RALLY}$  is the residual effect with a distribution of  $N(0, \sigma_{\varepsilon, RALLY}^2 \mathbf{I})$  and  $\mathbf{I}$  is the identity matrix.

161

162 The GWAS model is written as below:

$$163 \quad y = \mu_{GWAS} + \beta_{GWAS,year} X_{year} + g + \beta_i X_i + \varepsilon_{GWAS} \quad \text{[Equation 3]}$$

164 Where the model terms are described as below:

165  $y$  is the trait values in  $n$  lines.

166  $\mu_{GWAS}$  is the mean of trait value.

167  $\beta_{GWAS,year}$  is the fixed year effect.

168  $X_{year}$  is the year variable.

169  $g$  is the random genetic background effect with a distribution of  $N(0, \sigma_g^2 \mathbf{K})$  and  $\mathbf{K}$  is the additive  
170 genetic relationship matrix.

171  $\beta_i$  is the fixed allele effect at marker  $i$ .

172  $X_i$  is the number of alleles at marker  $i$ .

173  $\varepsilon_{GWAS}$  is the residual effect with a distribution of  $N(0, \sigma_{\varepsilon, GWAS}^2 \mathbf{I})$  and  $\mathbf{I}$  is the identity matrix.

174

175 In the given models, the terms of interest are  $\beta_{RALLY,year}$  and  $\beta_i$  in RALLY and GWAS,  
176 respectively. The term significances are determined by their corresponding standard normal  $Z$ -  
177 statistics at a Bonferroni corrected threshold of  $P = 0.05$ . Due to how the populations are  
178 simulated, some markers may not segregate in all the populations. These markers, along with  
179 the QTLs and other markers that are highly linked ( $r^2 > 0.99$ ) to QTLs, were removed from the  
180 RALLY and GWAS analyses. The simulations were repeated for 100 iterations and the models  
181 were fitted for each simulated population separately.

182

### 183 **Model correction by parametric control (PC)**

184 In the previously described naïve RALLY model (Equation 1 and 2), the RALLY test  
185 statistics may be inflated by population structure arising from consanguinity and population  
186 stratification. These factors can prevent a proper separation of markers under selection or drift if  
187 they are not addressed. To control for the inflation, we used a combined approach of genomic  
188 control (GC) (Devlin and Roeder 1999) and delta control (DC) (Gorroochurn et al. 2006) which  
189 we call parametric control (PC). In the absence of confounding factors, we expect the null test  
190 statistics ( $Z$ -scores) to be distributed as  $N(0,1)$ . However, in the presence of population  
191 structure, the distribution of null test statistics becomes  $N(\delta, \sigma)$ . As the terms imply, DC controls  
192 the inflation in mean  $\delta$  and GC controls the inflation in standard deviation  $\sigma$ . If we can estimate  
193  $\delta$  and  $\sigma$ , we can adjust the test statistics as the following:

$$194 \quad Z_{adj} = \frac{Z - \delta}{\sigma} \quad [\text{Equation 4}]$$

195 We used a maximum likelihood (ML) approach to estimate  $\delta$  and  $\sigma$ . For any value of  $Z$ ,  
196 both positive and negative signs are equally likely because the regression coefficient of one  
197 allele has the same magnitude but opposite sign of the other allele. Therefore, we can construct  
198 a composite likelihood function from two standard normal probability density functions that



199 account for positive and negative Z values. The likelihood function is shown in Equation 5  
200 below. To simplify the calculation, we used the log likelihood function as described in Equation 6  
201 below. We computed  $\delta$  and  $\sigma$  for an  $n$ -vector of Z values by either maximizing the log likelihood  
202 function, or equivalently, minimizing the negative log likelihood function using the “nlm” package  
203 in R (R Core Team 2021).

$$204 \quad f(Z|\delta, \sigma) = \prod_{i=1}^n \frac{1}{\sigma\sqrt{2\pi}} \cdot \frac{1}{2} \cdot \left( e^{-\frac{(Z_i-\delta)^2}{2\sigma^2}} + e^{-\frac{(-Z_i-\delta)^2}{2\sigma^2}} \right) \quad \text{[Equation 5]}$$

$$205 \quad l(\delta, \sigma) = \ln(f(Z|\delta, \sigma)) = n \cdot \ln\left(\frac{1}{\sigma\sqrt{2\pi}}\right) + \sum_{i=1}^n \ln\left[\frac{1}{2} \left( e^{-\frac{(Z_i-\delta)^2}{2\sigma^2}} + e^{-\frac{(-Z_i-\delta)^2}{2\sigma^2}} \right)\right] \quad \text{[Equation 6]}$$

206 An important factor in PC is the selection of null marker sets for calculating the inflation  
207 factors for adjusting the test statistics. The most conservative approach is to use all markers as  
208 the null, but this approach is unrealistic as it results in over-correction when the selection is  
209 strong and prevalent across the whole genome. Therefore, PC is best estimated from markers  
210 that have not undergone selection, although it is paradoxical given that such markers are  
211 unknown at this stage. As a compromise, we may assume that the allele frequency differences  
212 between first and last years are larger for markers under selection than drift. This assumption is  
213 reasonable for a modern breeding population that has undergone intensive selection. We first  
214 predicted the allele frequency change for each marker using the RALLY model and then  
215 identified the null marker set from markers that fall below various thresholds of allele frequency  
216 change. We tested the thresholds ranging from 0.05 to 0.50 at an increment of 0.01, in which  
217 the thresholds of 0.05 and 0.50 correspond to 40% and 99% of the total markers respectively.  
218 Unfortunately, because the variance of allele frequency change,  $\sigma_{\Delta p}^2 = p(1-p)/2N$ , is largest  
219 when the initial allele frequencies are intermediate (Falconer and Mackay 1996), a loss in  
220 RALLY's power to distinguish between weak selection signal and drift at those markers is  
221 unavoidable.

222

### 223 **Detection limits of RALLY**

224           We estimated the detection limits of RALLY using a simple example that is based on the  
225 simulated populations as described previously. We considered a QTL marker and five other  
226 proximal markers that are 1, 2, 3, 4 and 5 cM away. The initial QTL frequencies were set to 1/32  
227 to 16/32 with an increment of 1/32, and all possible marker-QTL haplotype frequencies were  
228 considered. We modelled selection on the QTL by increasing QTL initial frequency to the final  
229 frequency of 31/32 over 50 generations according to either a logistic or linear distribution.  
230 Consequently, the proximal markers experienced hitch-hiking effect due to the selection on  
231 QTL. Assuming an infinite population size, recombination is the sole factor that is responsible  
232 for the hitch-hiking effect, which allowed us to model the change in allele frequencies of the  
233 proximal markers. Non-recombinants are inherited at a probability of  $1 - r$  and recombinants  
234 are inherited at a probability of  $r$ . From this, we derived the expected allele frequencies for the  
235 proximal markers at each generation. Next, we randomly sampled 8 individuals per generation  
236 using a binomial distribution with the expected frequencies as the sampling probabilities. This  
237 step was repeated for 100 times for each tested marker-QTL haplotype frequencies. A more  
238 detailed description of this is provided in Figure S1.

239

### 240 **RALLY in two wheat panels**

241           We first applied the RALLY approach in the Triticeae Genome (TG) panel (Bentley et al.  
242 2014, Ladejobi et al. 2019) as a proof of concept. The TG panel has 344 winter wheat varieties  
243 from the UK, France and Germany that were released between 1948 and 2007 (Figure S2),  
244 which is ideal for analyzing selection over time in modern wheat breeding. We retained 333  
245 varieties that were in common between the TG panel data derived from DArT markers (Bentley

246 et al. 2014) and genotype-by-sequencing (GBS) markers (Ladejobi et al. 2019). The DArT  
247 marker data was only used in a later analysis for estimating multivariate selection parameters.  
248 From the initial 41,861 GBS markers, we removed 3,009 markers that are in high linkage  
249 disequilibrium (LD) ( $r^2 > 0.2$ ) with markers from other chromosomes which left us with 38,852  
250 markers. These markers were positioned according to the IWGSC RefSeq v1.0 genome  
251 assembly. Here, we applied a similar model to Equation 2 with an additional fixed effect to  
252 account for the country of origin. We identified the year regression coefficients, applied the  
253 same level of PC as identified from the simulation to adjust the test statistics, and determined  
254 the significance at a Bonferroni-corrected threshold of 0.05.

255         Next, we replicated the analysis in the WAGTAIL panel (Fradgley et al. 2019) to test  
256 RALLY performance in a different sampling panel of modern wheat varieties. The WAGTAIL  
257 panel has 403 winter wheat varieties of mostly UK origin that were released between 1916 and  
258 2010. Of the 403 varieties, 283 originated from the UK, 51 from France, 34 from Germany and  
259 35 from other countries including Australia, Belgium, Canada, Denmark, the Netherlands,  
260 Sweden, Switzerland, and United States. There were 99 overlapping varieties between the TG  
261 and WAGTAIL panels. Since the WAGTAIL panel was genotyped using the wheat 90k array  
262 (Wang et al. 2014) and did not immediately have physical map positions for direct comparison  
263 with the TG panel, we identified the physical map positions from the IWGSC RefSeq v1.0  
264 annotation file. We retained 5,592 out of 26,015 markers that had matching chromosomes  
265 between the original WAGTAIL genetic map and the physical map. We also removed 319  
266 markers that are in high LD ( $r^2 > 0.2$ ) with markers from other chromosomes which left us with  
267 5,273 markers. We applied Equation 2 with an additional fixed country of origin effect to the  
268 WAGTAIL panel and computed the year regression coefficients with the same PC and multiple  
269 testing correction to the test significances.

270

## 271 **Estimating local heritabilities from RALLY QSLs**

272 We clustered the significant markers identified from RALLY into groups based on the  
273 extent of LD surrounding the markers. Because genomic markers are not completely  
274 independent, some significant markers may be tagging the same QSLs. Starting with the most  
275 significant (focal) markers within each chromosome, we assigned markers that have  $r^2 > 0.2$   
276 with the focal marker to the same group. To avoid incorrectly mapped markers, we require the  
277 groups to have a minimum of 10 markers in the TG panel and 5 markers in the WAGTAIL panel  
278 due to lower marker density. As a trade-off, there may be bias against genomic regions with  
279 sparse marker density such as the D-genome. We repeated the process for the next significant  
280 marker that has not been assigned to any group until all significant markers have been  
281 assigned. Lastly, we merged all overlapping groups.

282 We estimated the local heritabilities ( $h_l^2$ ) for each QSL in the TG panel using the  
283 genomic heritabilities partitioning method that was introduced by Schork (2001) and Visscher et  
284 al. (2007). QSLs with non-zero  $h_l^2$  would support the hypothesis of selection over drift for the  
285 observed change in allele frequency. The TG panel includes 12 traits: Flowering Time (FT),  
286 Lodging (LODG), Yield (YLD), Plant Height (HT), Grain Protein Content (PROT), Winter Kill  
287 (WK), Awns (AWNS), Specific Weight (SPWT), Total Grain Weight (TGW), Ears per m<sup>2</sup> (EM2),  
288 Tiller Number (TILL) and Maturity (MAT) (Bentley et al. 2014, Ladejobi et al. 2019). We were not  
289 able to estimate the  $h_l^2$  in the WAGTAIL panel since we did not have multi-trait data for the  
290 WAGTAIL panel. For each trait and QSL combination, we estimated the  $h_l^2$  from the following  
291 mixed model fitted using the *mmer* function from the “sommer” package (Covarrubias-Pazaran  
292 et al. 2016) in R (R Core Team 2021):

$$293 \quad y = \mu + X\beta + g_0 + g_i + \varepsilon \quad \text{[Equation 7]}$$

294 Where the model terms are described as below.

295  $y$  is a vector of phenotypic trait values for  $n$  varieties.

296  $\mu$  is the trait mean.

297  $X$  is an  $n \times 2$  matrix of incidence matrix for the fixed year and country of origin effects.

298  $\beta$  is a vector of length 2 of the fixed year and country of origin effects.

299  $g_0$  is a vector of length  $n$  of the random genetic effect due to relationship among varieties  
300 calculated from markers not in group  $i$ , and it follows a distribution of  $N(0, \sigma_{g,0}^2 K_0)$ .

301  $g_i$  is a vector of length  $n$  of the random genetic effect due to relationship among varieties  
302 calculated from markers in group  $i$ , and it follows a distribution of  $N(0, \sigma_{g,i}^2 K_i)$ .

303  $\varepsilon$  is a vector of length  $n$  of the random residual effect under a distribution of  $N(0, \sigma_\varepsilon^2 I)$ .

304 After each model was fitted, we calculated the  $h_l^2$  as  $\frac{\sigma_g^2}{\sigma_g^2 + \sigma_\varepsilon^2}$ . For any trait, we identified the  
305 non-zero  $h_l^2$  groups ( $h_l^2 > 0.001$ ) and refitted a new mixed model with all the non-zero  $h_l^2$   
306 groups. The model is shown as below with the similar terms as explained in Equation 7.

307 
$$y = \mu + X\beta + g_0 + \sum g_i + \varepsilon \quad \text{[Equation 8]}$$

308 From Equation 5, we estimated the new  $h_l^2$  as  $\frac{\sigma_{g,i}^2}{\sum \sigma_{g,i}^2 + \sigma_\varepsilon^2}$  and used these as the final  
309 estimated  $h_l^2$  for each trait and group combination.

310

### 311 **Associating marker effects with alleles that are increasing over time**

312 We estimated the marker allele effects for each trait in the TG panel using ridge  
313 regression (RR) (Hoerl and Kennard 1970) and least absolute shrinkage and selection operator  
314 (LASSO) (Tibshirani 1996) approaches. For the RR approach, we used the *mixed.solve* function

315 from the “rrBLUP” package (Endelman 2011) in R (R Core Team 2021). For the LASSO  
316 approach, we used the *cv.glmnet* function from the “glmnet” package (Friedman et al. 2010) in  
317 R (R Core Team 2021). In both approaches, we fitted a multiple linear regression model as  
318 shown below:

$$319 \quad y = \mu + Zu + \varepsilon \quad \text{[Equation 9]}$$

320 Where the model terms are described as below.

321  $y$  is a vector of phenotypic trait values for  $n$  varieties.

322  $\mu$  is the trait mean.

323  $Z$  is a  $n \times p$  matrix of numerical marker genotypes coded as -1, 0 and 1 for homozygous first  
324 allele, heterozygous and homozygous second allele, respectively. The number of markers is  $p$ .

325  $u$  is a vector of marker allele effects. In RR,  $u$  is estimated from minimizing the loss function of

326  $L_{RR}(u) = \|y - \mu - Zu\|^2 + \lambda\|u\|^2$  where  $\lambda = \sigma_\varepsilon^2 / \sigma_u^2$  and  $u \sim N(0, \sigma_u^2 I)$  (Endelman 2011). In

327 LASSO,  $u$  is estimated from minimizing the loss function of  $L_{LASSO}(u) = \|y - \mu - Zu\|^2 + \lambda\|u\|$

328 where  $\lambda$  is determined from the default 10-fold cross validations in *cv.glmnet* (Friedman et al.

329 2010). In addition, the multivariate LASSO model in “glmnet” was used to ensure that the effects

330 for all traits are estimated from the same set of chosen markers.

331  $\varepsilon$  is a vector of residual effects that follows a distribution of  $N(0, \sigma_\varepsilon^2 I)$ .

332 For each trait  $j$  and marker  $k$ , we identified  $\tilde{d}_{j,k}$  which is the effect direction for the allele

333 that is increasing in frequency over time, as follows: first, we determined  $\tilde{u}_{j,k}$  which is the

334 direction of marker allele effect estimated from either RR or LASSO using the *sign* function in R

335 (R Core Team 2021). This resulted in  $\tilde{u}_{j,k} = -1$  for negative effect,  $\tilde{u}_{j,k} = 0$  for no effect and

336  $\tilde{u}_{j,k} = 1$  for positive effect. Next, we determined  $\tilde{\beta}_{j,k}$  which is the direction of year regression

337 coefficient estimated from RALLY. This resulted in  $\tilde{\beta}_{j,k} = -1$  for decreasing allele and  $\tilde{\beta}_{j,k} = 1$   
338 for increasing allele. Because the marker alleles were coded similarly in the RALLY and marker  
339 BLUP models, we could calculate  $\tilde{d}_{j,k}$  as  $\tilde{u}_{j,k} \times \tilde{\beta}_{j,k}$  directly.  $\tilde{d}_{j,k} = 1$  suggests that the increasing  
340 allele has a positive effect and  $\tilde{d}_{j,k} = -1$  suggests that the increasing allele has a negative  
341 effect.  $\tilde{d}_{j,k} = 0$  is only possible in LASSO due to variable selection, which simply implies that  
342 there is no effect. For any trait, an excess of either  $\tilde{d}_{j,k} = -1$  or  $\tilde{d}_{j,k} = 1$  across all markers  
343 indicates a possible directional selection.

344 For a pair of traits  $j_1$  and  $j_2$ , we calculated  $\tilde{d}_{j_1,j_2,k} = [\tilde{d}_{j_1,k} \quad \tilde{d}_{j_2,k}]$  which is the pairwise  
345 effect direction for the increasing allele.  $\tilde{d}_{j_1,j_2,k} = [1 \quad 1]$  implies that the increasing allele has  
346 positive effects on both traits,  $\tilde{d}_{j_1,j_2,k} = [1 \quad -1]$  or  $\tilde{d}_{j_1,j_2,k} = [-1 \quad 1]$  implies that the increasing  
347 allele has a positive and a negative effect on either trait, and  $\tilde{d}_{j_1,j_2,k} = [-1 \quad -1]$  implies that the  
348 increasing allele has negative effects on both traits. By forming a contingency table from the  
349 counts of all four possible  $\tilde{d}_{j_1,j_2,k}$  combinations, we tested for selection-related interaction  
350 between the pairs of traits using a  $\chi^2_{df=1}$  test in the results involving LASSO. We did not test the  
351 results involving RR because the marker effects are not independent.

352

### 353 **Estimating multivariate selection parameters**

354 We estimated the multivariate selection parameters in the TG panel using the  
355 multivariate breeder's equation of  $\Delta Z = G\beta_{sel}$  (Lande and Arnold 1983). We obtained the  
356 selection response ( $\Delta Z$ ), genetic variance-covariance matrix ( $G$ ) and phenotypic variance-  
357 covariance matrix ( $P$ ) from the trait and marker data. Next, we solved the multivariate breeder's  
358 equation for the selection gradient  $\beta_{sel}$  and the equations of  $S = P\beta_{sel}$  and  $i = S/\sqrt{diag(P)}$  for  
359 the selection differential ( $S$ ) and selection intensity ( $i$ ) (Falconer and Mackay 1996). Lastly, we

360 decomposed the multivariate selection parameters into direct and indirect partitions as a method  
361 to quantify the direct and indirect historical selection in the TG panel. As a check, we repeated  
362 the same process in a simulated example. Complete details on the methods on estimating  
363 multivariate selection parameters are provided in the Supplementary Methods.

364

## 365 **Results**

### 366 **RALLY and GWAS in simulated populations**

367 We tested RALLY's ability in identifying selection- or drift-induced marker allele  
368 frequency changes in simulated populations with (S) and without (U) selection ([Figure 1](#)) by  
369 varying the degree of parametric control (PC). Briefly, PC combines genomic control (GC)  
370 (Devlin and Roeder 1999) and delta control (DC) (Gorroochurn et al. 2006) to correct for  
371 inflation in test statistics due to population structure. Details on the PC approach and  
372 simulations are described in the Materials and Methods section. Across all tested allele  
373 frequency change thresholds ( $t$ ) for null marker set, setting  $t > 0.11$  produced better control of  
374 test statistics (significant markers in S < 1.867%, U < 0.109%) than without any correction  
375 (significant markers in S = 1.942%, U = 0.089%) ([Figure 2A](#), Table S1). At  $t = 0.15$ , we found  
376 little significance in the unselected population across all 100 simulations with some inevitable  
377 loss of significance in the selected population (significant markers in S = 0.994%, U = 0.012%)  
378 (Table S1). This result suggests that PC at this threshold can reasonably separate out the true  
379 selection signals from drift in our simulation. To err on the cautious side, we used a higher  
380 threshold of  $t = 0.20$  in the simulation, TG and WAGTAIL panels.

381 We evaluated the QSL/QTL mapping performances of RALLY and GWAS in the  
382 simulated populations with selection ([Figure 1](#)) and found a higher mapping power in RALLY  
383 over GWAS ([Figure 2](#)). Across the 100 simulations, we found that the individual significant



384 markers are rarely shared between RALLY and GWAS ([Figure 2B](#)), and even less likely to be  
385 found in GWAS but not RALLY ([Figure 2D](#)). Most of the significant markers are found in RALLY  
386 but not GWAS ([Figure 2C](#)). The low number of significances in GWAS is likely because the  
387 simulated QTLs have small effects and low heritabilities, which is common for quantitative traits.  
388 The heritabilities for the largest QTLs are approximately 0.030 and the smallest QTLs are  
389 approximately 0.002. An additional intention of having low heritabilities is to reduce the fixation  
390 rate of QTL due to selection and prevent pre-matured fixation of QTL in the simulated  
391 population.

392 We repeated the RALLY and GWAS analyses in the unselected populations as a control  
393 for the same analyses in the selected populations ([Figure 2](#)). On average across all 100  
394 simulations, RALLY identifies 0.1 significant markers out of 19,000 total markers in the  
395 unselected population compared to 104.5 significant markers in the selected population. This  
396 result suggests that less than 0.1% of the significant markers in the selected population are  
397 likely caused by drift instead of selection. In the selected population, there are more significant  
398 markers (means of 99.4 versus 5.1) that are close to the QTLs ( $\leq 5$  cM) than far ( $> 5$  cM)  
399 ([Figure 2B-C](#)). Assuming that all 32 QTLs are selected and all markers within 5 cM of the QTLs  
400 experience hitch-hiking effect, there should be a maximum of 3,200 significant markers in the  
401 selected population. However, the number of significant markers is much lower in reality  
402 because: (1) the selection force is proportional to the QTL effects ([Figure S3](#)), (2) the hitch-  
403 hiking effect depends on the initial marker-QTL haplotype distribution ([Figure S1](#)), and (3) the  
404 hitch-hiking effect decreases as genetic distance increases. On the other hand, GWAS  
405 performance remains similar between the selected and unselected populations ([Figure 2](#)).

406

## 407 **Detection limits of RALLY**

408           Following from the previous simulation, we investigated the relationship between QTL  
409 under selection and its proximal markers and the results suggested a detection limit of  
410 approximately 5 cM (Figure S4). Here, we considered 10 markers that are evenly spaced  
411 between 1 to 10 cM away from a QTL and evaluated how these marker allele frequencies  
412 change as a result of increasing QTL frequency. Because the markers are linked to the QTL, we  
413 expect their frequencies to follow the QTL frequency in an inversely proportional way according  
414 to their genetic distances from the QTL. This process is commonly known as hitch-hiking, and it  
415 is an important consideration for RALLY because hitch-hiking markers are more likely to be  
416 genotyped than the true QTLs. Curiously, our results suggest that the ability of RALLY in  
417 identifying significant hitch-hiking markers depends on the QTL-marker haplotypes, QTL initial  
418 frequency, and genetic distance between QTL and marker (Figure S4). With all factors  
419 considered, RALLY rarely detects significance beyond 5 cM although our previous results  
420 showed that some long-range significances may still be present ([Figure 2B](#)). A possible  
421 explanation for this is when multiple QTLs co-localize into one major QTL haplotype, which may  
422 amplify the significances of surrounding markers.

423

## 424 **RALLY in two wheat panels**

425           We mapped 22 significant QSLs (Bonferroni corrected  $p < 0.05$ ) across 14  
426 chromosomes in the Triticeae Genome (TG) panel using RALLY ([Table 1](#), [Figure 3](#), Figure S5,  
427 File S1). Because the distances between significant markers and true QTLs are unknown, we  
428 used a linkage disequilibrium (LD) measure of  $r^2 > 0.2$  as a method to identify the genomic  
429 boundaries that the significant markers tag. This method resulted in QSL intervals ranging from  
430 1.46 Mb to 774.73 Mb with a mean of 148.74 Mb. Given the large blocks of genomic regions

431 and a previously approximated RALLY detection limit of 5 cM, many of the QSLs are likely to fall  
432 within low recombination regions. QSLs in high recombination regions are harder to map due to  
433 the lack of markers tagging the causative QTLs. Besides, sustained selection is more likely to  
434 be observed on multiple weakly favorable alleles in low than high recombination regions.

435 Of the 22 QSLs, 12 co-localize with previously mapped QTLs using GWAS (Ladejobi et  
436 al. 2019) in the TG panel ([Table 1](#), [Figure 3](#), [Figure 4](#), Table S2). QSLs/QTLs found in both  
437 RALLY and GWAS indicate that their effects are likely beneficial and have been selected during  
438 the breeding process. QSLs unique to RALLY suggest that their effects might be too small for  
439 GWAS to detect or the specific traits have not been analyzed for GWAS. QTLs unique to GWAS  
440 suggest that they are still segregating in the population, which could be due to various reasons  
441 like recent introduction into the breeding population and linkage drag.

442 A literature search showed that RALLY QSLs occur in both well-characterized and novel  
443 genomic regions in winter wheat (Table S3). The most significant RALLY QSL-6 mapped to a  
444 large region in chromosome 2B: 11 – 230 Mb, which includes *Ppd-B1* (Mohler et al. 2004) and  
445 multiple resistance loci of *Yr5*, *Yr7* and *YrSP* (Marchal et al. 2018). Another major QSL-16  
446 mapped to a large region in chromosome 6A: 62 – 545 Mb, which contains *TaGW2* (Su et al.  
447 2011) and the GA-responsive dwarfing genes of *Rht24* (Würschum et al. 2017) and *Rht25* (Mo  
448 et al. 2018). Interestingly, the durum wheat dwarfing gene *Rht14/16/18* resides in the same  
449 genomic region, although it remains to be tested whether it is allelic to *Rht24* (Haque et al.  
450 2011). A recent EnvGWAS in winter wheat by Sharma et al. (2021) also mapped to the same  
451 genomic region (6A: 396 Mb) but without mention of any *Rht* candidate gene. On a broader  
452 scale, 16 RALLY QSLs co-localize with the recently identified meta-QTLs on yield and yield-  
453 related traits in wheat (Yang et al. 2021). 9 RALLY QSLs overlap with the QTLs identified from a  
454 Multi-parental Advanced Generation Inter-Cross (MAGIC) population of 16 diverse UK winter  
455 wheat varieties (Scott et al. 2021).

456 In addition, we found 11 RALLY QSLs that overlap with known alien and non-alien  
457 introgressions in wheat (Cheng et al. 2019). These include major introgressions like the 2A: 0 –  
458 11 Mb from *Aegilops ventricosa* (Robert et al. 1999, Rhoné et al. 2007) and 2B: 90 – 749 Mb  
459 from *Triticum timopheevii* (Tsilo et al. 2008, Martynov et al. 2018). These two introgressions  
460 were shown to segregate among the UK winter wheat varieties by Scott et al. (2021). Because  
461 alien introgressions tend suppress recombination (Gill et al. 2011), they can be easily mapped  
462 using RALLY. Considering all overlaps in results between RALLY and the studies described  
463 thus far, we found 19 RALLY QSLs that can be traced to at least one study.

464 In the WAGTAIL panel, we mapped 19 significant QSLs across 13 chromosomes using  
465 RALLY (Table S4, Figure S6, File S1). We used the same approach as we did with the TG  
466 panel to identify the boundaries of these significant QSLs. With 99 varieties in common between  
467 the TG and WAGTAIL panels, we expect a high number of overlapping QSLs. 10 out of 19  
468 QSLs in the WAGTAIL panel matched with 10 out of 22 QSLs in the TG panel ([Figure 4](#)), which  
469 is approximately one-half overlap between them. Given that the TG panel was genotyped using  
470 GBS (Elshire et al. 2011) while the WAGTAIL panel was genotyped using the 90k array (Wang  
471 et al. 2014), the genotyping and mapping quality of these two panels are likely different. This  
472 may partially explain why the results from the TG and WAGTAIL panels did not fully overlap.  
473 Another possible reason is that the distributions of countries of origins differ in the two panels in  
474 which the TG panel is more homogeneous than the WAGTAIL panel.

475

#### 476 **Local heritabilities in the RALLY QSLs**

477 We calculated local heritabilities for the 22 RALLY QSLs as a support for possible  
478 selection over drift at these QSLs ([Table 2](#), [Figure 5](#)). We found that all 22 QSLs have non-zero  
479 local heritabilities for at least one trait. We tested for non-zero in the local heritabilities using a

480 likelihood ratio test to compare between the mixed models with and without QSLs (Santantonio  
481 et al. 2019). However, most of the tests were non-significant due to low power (Table S5). The  
482 tests for QSLs collectively showed significance in 5 out of 12 traits, which comes at a cost of  
483 losing the test on individual QSL in exchange for a slightly higher power. In an extreme example  
484 with a total heritability of 0.379, QSL-16 at 6A: 89,355,276 is associated with 8 traits and found  
485 to co-localized with all other previously mentioned results. While it is possible that the underlying  
486 candidate genes *TaGW2* (Su et al. 2011), *Rht24* (Würschum et al. 2017) and *Rht25* (Mo et al.  
487 2018) have pleiotropic effects that are beneficial for wheat breeding, we cannot exclude the  
488 possibility of additional genes that provide breeding advantages in the same haplotype block.  
489 Nonetheless, given that QSL-16 has already played a major role in wheat breeding, it is unlikely  
490 to be useful for future breeding. The genomic region with the next largest total heritability of  
491 0.226 is located in QSL-2 at 1A: 138,028,803. While no known gene has been mapped around  
492 QSL-2, results from our analysis and others (Cadalen et al. 1998, Griffiths et al. 2012, Tiwari et  
493 al. 2016) suggest that it may contain loci responsible for plant height and grain protein content.

494         Between the cumulative heritabilities explained by these 22 QSLs and the remaining  
495 genomic regions, HT and TGW are higher in the QSLs, AWNS is lower in the QSLs and the  
496 other 9 traits are about equal ([Table 2](#), [Figure 5](#)). This result highlights the narrow genetic  
497 diversity that is often seen in modern varieties (Reif et al. 2005) due to the repeated use of  
498 identical favorable haplotypes in wheat breeding. Fortunately, the remaining “unselected”  
499 genomic regions for important traits like yield, grain protein content and plant height are not fully  
500 devoid of heritabilities. There is still room for varietal improvement without the introduction of  
501 favorable exotic alleles in the short term, which suggests that it might be better to devote some  
502 of the resources in pre-breeding on these genomic regions instead. For traits like TGW and  
503 TILL, breeders may need to look for alternative genetic resources to compensate for the lack of  
504 diversity.

505

## 506 **Marker effects of alleles that are increasing over time**

507           We evaluated the marker allele effects using the prediction models from Ridge  
508 Regression (RR) and Least Absolute Shrinkage and Selection Operator (LASSO). Across all 12  
509 traits, RR resulted in higher prediction accuracy than LASSO although the differences were  
510 comparable in some traits (Figure S7 and S8). Despite that, we retained the results from both  
511 approaches because the variable selection step in LASSO is important for a follow-up test  
512 involving trait pairs.

513           We examined the marker allele effect directions for increasing alleles and found  
514 excesses in one over another direction across each of the 12 traits ([Figure 6](#), Figure S9). We  
515 first partitioned the markers based on their RALLY significance into three groups: (1) markers  
516 with p-values lower than the Bonferroni corrected threshold of 0.05, (2) markers with p-values  
517 between 0.05 and the Bonferroni corrected threshold of 0.05, and (3) markers with p-values  
518 higher than 0.05. The results from using either RR ([Figure 6](#)) or LASSO (Figure S9) are similar  
519 although the differences across the significance groups in LASSO are less pronounced, i.e.  
520 there are more differences between group 1 and 2 in RR than LASSO results. This might be  
521 due to LASSO selected markers having weak but small, non-significant changes in allele  
522 frequencies over time. Within the RR results, the excesses in effect directions are strongest in  
523 the significance group 1 and weakest in the significant group 3, which suggest that the excesses  
524 can be related to the favored direction of selection. The lack of excesses in significance group 3  
525 implies that favorable and unfavorable alleles are still segregating about equally in the  
526 unselected genomic regions.

527           Across all 12 traits, the excesses agree with our expectation of traits that are important  
528 in wheat breeding. The most extreme example is yield (YLD) where both the RR and LASSO

529 results show a near complete excess of positive effects in the increasing alleles in significance  
530 group 1. As shown previously by Mackay et al. (2011), the genetic gain in the UK winter wheat  
531 yield has been rising steadily over time. The next four traits with strong excesses are flowering  
532 time (FT), lodging score (LODG), plant height (HT) and grain protein content (PROT). FT,  
533 LODG and HT are favored for lower trait values, and thus the increasing alleles have excesses  
534 in negative effects. On the contrary, higher PROT is valuable for bread making quality, which is  
535 unfortunately going in the opposite direction due to a strong negative genetic correlation with  
536 yield (Scott et al. 2021). This result suggests that the selection for higher yield is a lot stronger  
537 than the selection for higher grain protein content. In the remaining traits, the excesses are  
538 smaller and less obvious given the variations seen from RR and LASSO results, which suggests  
539 that directional selection is likely weak for these traits.

540 By comparing the effect directions for increasing alleles in pairs of traits, we identified  
541 the priorities of traits under selection ([Table 3](#), Table S6 and S7, [Figure 7](#)). Taking YLD and  
542 PROT for example, there is a strong excess for alleles with positive YLD but negative PROT.  
543 This result reiterates the priority of YLD over PROT in wheat breeding. Between TGW and EM2,  
544 there is an excess for alleles with positive EM2 and negative TGW which suggests that more  
545 ears with lighter grains are preferred over fewer ears with heavier grains. In a different  
546 perspective, the results here also highlight the constraints imposed by genetic correlations  
547 across traits. For example, there is a small proportion of alleles with the same effect directions  
548 for YLD and PROT. These alleles could be used in breeding high YLD and PROT varieties,  
549 although it is still important to consider the possibility that these alleles could be unfavorably  
550 associated with other traits.

551

## 552 **Multivariate selection parameters**

553           In contrast to a genomic-centric approach that has been described thus far, the  
554 multivariate selection parameters may provide an alternative, trait-focused perspective on the  
555 historical selection of winter wheat represented by the TG panel. We found a strong  
556 misalignment between the selection response ( $\Delta Z$ ) and gradient ( $\beta_{\text{sel}}$ ) where the directions of the  
557 vectors' elements are the opposite in 5 out of 12 traits (Table S8). If the selection parameters  
558 are estimated accurately, such divergence may imply an inefficient selection process. In  
559 addition, we partitioned the selection response ( $\Delta Z$ ), differential ( $S$ ) and intensity ( $i$ ) into direct  
560 and indirect components to quantify the amount of each selection parameter that is directly due  
561 to the available variation within a trait or indirectly due to the covariation with other traits. In an  
562 example with HT, we found positive direct effects in  $\Delta Z$ ,  $S$  and  $i$ , which contradicts the known  
563 selection on dwarfing genes like *Rht1*, *Rht2* and *Rht24* (Pearce et al. 2011, Würschum et al.  
564 2017). Given the uncertainties in the multivariate selection parameters, we have provided the  
565 full results in the Supplementary Results and we advise to treat these estimates with caution.

566           Following the results, we investigated the possible causes of issues in estimating  
567 multivariate selection parameters using a simulated example with a single generation of  
568 selection involving three genetically correlated traits. First, we found that the genetic variances  
569 and covariances ( $G$ ) estimated from mixed linear model were close to the true simulated values  
570 but with low precision (Table S9, Figure S10). Next, we computed the selection parameters ( $\Delta Z$ ,  
571  $\beta_{\text{sel}}$ ,  $S$ ,  $i$ ) from the simulation directly, true  $G$  and estimated  $G$ , which are referred to as true,  
572 realized and estimated values, respectively. Given the imprecise estimates of  $G$ , we observed  
573 lower correlations between the estimated and true values than between the realized and true  
574 values (Table S9, Figure S11-S16). Despite using the true  $G$ , the realized values still failed to  
575 match the true values perfectly, which indicates that the deviations in realized  $\Delta Z$  are carried  
576 over into the other selection parameters that are estimated downstream.



577

## 578 **Discussion**

### 579 **Advantages and disadvantages of RALLY**

580 RALLY has a major feature of being a trait-free method for mapping QSLs; however, this  
581 feature is a double-edged sword. For any population, RALLY involves only a single, relatively  
582 simple logistic regression analysis. In contrast, GWAS requires either multiple, simple mixed  
583 model analyses for each trait or a single, yet computationally intensive multi-trait analysis.  
584 Unlike any other trait-based mapping methods, the QSLs identified through RALLY are not  
585 restricted to only traits that are scored. While this makes RALLY a convenient method, the  
586 results do not inform us which traits the QSLs are associated with. In this regard, we will need to  
587 rely on other trait-based analyses like GWAS or genomic variance partitioning (Schork 2001,  
588 Visscher et al. 2007) to relate QSLs to traits. This additional step is not restricted to the same  
589 population as the QSL-trait information can be drawn from other studies such as GWAS on 47  
590 traits in the wheat MAGIC diverse population (Scott et al. 2021). Therefore, RALLY can function  
591 as a replication of results from other studies.

592 As a kinship-free method, RALLY avoids any potential issues that may arise from the  
593 use of genomic relationship matrix (GRM) in mixed linear models. Recently, kinship estimates  
594 have been shown to be biased under complex population structure (Ochoa and Storey 2021),  
595 which can arise due to selection and migration of materials across breeders and countries.  
596 Besides, kinship estimates depend on the assumption that the alleles frequencies observed in  
597 the study population are representative of the reference or base population. For a population  
598 that has only experienced weak to no selection, the mean of genome-wide marker variance  
599 might be a reasonable approximation to the reference population. But, in populations under  
600 strong selection like modern crop varieties, the deviation between observed and true (reference)  
601 distribution of allele frequencies may not be trivial. Jiang et al. (2021) showed that the kinship

602 estimates are biased when the observed distribution of allele frequencies fails to match the true  
603 distribution. In addition, a similar study on populations of modern wheat and barley varieties  
604 suggested that their kinship estimates may be biased due to long period of intensive selection  
605 (Sharma et al. 2021). However, the bias impacts on mapping power in GWAS and accuracy of  
606 variance component estimates remain to be evaluated.

607         Given that RALLY is designed specifically for mapping QSLs that have been selected  
608 over a time period, there may be limited utilities outside of its target scope. Our RALLY analyses  
609 model the change in allele frequency under a logistic distribution, which requires both genomic  
610 marker and year of variety release information. So, RALLY cannot be immediately applied to  
611 typical artificial mapping populations like bi-parental, nested association mapping (NAM) or  
612 MAGIC populations. However, we can extend the use of RALLY by conceptualizing it in its  
613 simplest form, which is a regression of marker allele on a variable of interest. For example, we  
614 can regress the marker allele on a continuous geographical origin variable such as latitudes and  
615 altitudes. The outcomes would directly define alleles that are relevant to local adaptation.  
616 Furthermore, the hybrid approach of parametric control (PC) is independent of RALLY and can  
617 be used in any genome-wide mapping analyses as a replacement for GRM and mixed linear  
618 model.

619

## 620 **Selection history and future direction in winter wheat breeding**

621         Given the largely incomplete overlap between RALLY and GWAS QSLs/QTLs in the TG  
622 panel, GWAS-specific QTLs may not have been directly useful in breeding. Several possible  
623 reasons include linkage drag between the QTLs, recent introduction of QTL alleles into the  
624 breeding pool, and ineffective selection at those QTLs. In the absence of genome editing to  
625 remove unfavorable alleles (Johnsson et al. 2019), linkage drag is unavoidable due the low

626 probability of creating favorable recombinant haplotypes. New QTL alleles are hard to map  
627 under RALLY due to low power issue, but it can be improved by including more recent varieties.  
628 Ineffective selection is a direct consequence of the selection tendency towards low-hanging  
629 fruits. In an extreme example involving a cross between an elite variety and an exotic wild  
630 relative, selection is bound to reconstitute the elite genome because of the higher probabilities  
631 of favorable alleles in the elite over exotic genomes (Gorjanc et al. 2016). This phenomenon is  
632 observed in a large-scale crossing program involving groups of one exotic and two elite parents,  
633 in which the resulting lines lost approximately two-thirds of the expected exotic genome (Singh  
634 et al. 2021). In this regard, the approach of Origin Specific Genomic Selection (OSGS) (Yang et  
635 al. 2020) can be used to specifically target genomic regions outside of RALLY QSLs for  
636 selection.

637         The association between directions of allele frequency change and predicted marker  
638 effects provides us with an overview of selection priorities ([Figure 6](#) and [7](#)). High yield, short  
639 plants, early flowering, reduced lodging and reduced grain protein content are clearly preferred  
640 under directional selection. However, there is no obvious directional selection on spikes and  
641 grain related traits, which suggests that there is no specific morphology that provides advantage  
642 in the breeding practice. The pairwise analysis further demonstrates the selection priorities and  
643 genetic correlations between traits. The results can be used to formulate a future breeding  
644 direction, for example, breeding for varieties with high yield and grain protein content by  
645 focusing on increasing the frequencies of the favorable alleles on both traits. In line with the  
646 global interest in shifting towards more sustainable agricultural practice (Hoad 2010), this  
647 approach can be extended to include traits relevant to sustainability and climate resilience to  
648 better guide the breeding direction.

649

## 650 **Limited practical use of multivariate breeder's equation**

651 As shown in the results involving the TG panel, the multivariate breeder's equation has  
652 limited practical use in estimating selection parameters (Table S8). An important component of  
653 the equation is the genetic variance-covariance matrix (G). The assumption that G is constant is  
654 likely violated because G should have been calculated from the base population (Walsh and  
655 Lynch 2018) rather than a population under selection over a time period. While this violation  
656 likely contributes to the poor estimates of the selection parameters, it is not the only source of  
657 issue. Variations across two tested genotyping methods (GBS and DArT) resulted in severely  
658 different selection parameters (Table S8) even when the G were similar across the two methods  
659 (Table S10).

660 Despite fulfilling the assumption of constant G and eliminating the genotyping  
661 discrepancy in our simulated example, additional issues remain in estimating selection  
662 parameters from the multivariate breeder's equation. We found that the poor estimation of  
663 multivariate selection parameters is caused by imprecise G estimated from mixed linear model.  
664 However, the estimation of multivariate selection parameters cannot be completely recovered  
665 even when the true G is used. This is probably because the multivariate breeder's equation can  
666 only capture the means but not the variances of the selection parameters ( $\Delta Z$ ,  $\beta_{sel}$ ,  $S$ ,  $i$ ). Since  
667 the selection parameters are derived sequentially, repeated deviations from the means result in  
668 poor estimates of the selection parameters. This issue can be remedied by increasing the  
669 sample size, although there is a limit to the sample size due to practicality in breeding practice.  
670 Furthermore, the deviation is amplified across multiple generations of selection. Given the multi-  
671 layered issues with estimating selection parameters using the multivariate breeder's equation, it  
672 is best to limit its use to predict forward for a single generation as a rough guide to selection  
673 experiments involving crop varieties.

674

675 **Acknowledgments**

676 We thank Rajiv Sharma, Ian Dawson and David Marshall for helpful discussion on the work.

677

678 **Author Contributions**

679 CJY and IM conceived the work, performed the analyses and wrote the manuscript. OL  
680 provided data for the Triticeae Genome (TG) panel. RM and WP provided critical comments. All  
681 authors read, revised and approved the manuscript. No external funding was received for the  
682 work in this manuscript.

683

684 **Data Availability**

685 The GBS and phenotypic trait data for the TG panel (Ladejobi et al. 2019) were downloaded  
686 from [doi.org/10.6084/m9.figshare.7350284](https://doi.org/10.6084/m9.figshare.7350284). The TG panel DArT data (Bentley et al. 2014) and  
687 WAGTAIL panel data (Fradgley et al. 2019) were downloaded from [https://www.niab.com/  
688 research/agricultural-crop-research/resources](https://www.niab.com/research/agricultural-crop-research/resources). The IWGSC RefSeq v1.0 annotation file  
689 containing the physical map positions for the 90k wheat array was downloaded from  
690 [https://urgi.versailles.inra.fr/download/iwgsc/IWGSC\\_RefSeq\\_Annotations/v1.0/iwgsc\\_refseqv1.  
691 0\\_Marker\\_mapping\\_summary\\_2017Mar13.zip](https://urgi.versailles.inra.fr/download/iwgsc/IWGSC_RefSeq_Annotations/v1.0/iwgsc_refseqv1.0_Marker_mapping_summary_2017Mar13.zip). Computational analyses were performed using  
692 R version 4.1.0. All R scripts used in the analyses can be found at [https://cjiang-  
693 sruc.github.io/RALLY](https://cjiang-sruc.github.io/RALLY).

694

695 **Competing Interests**

696 The authors declare no conflict of interest.

697

698 **References**

- 699 1. Bentley AR, Scutari M, Gosman N, Faure S, Bedford F, Howell P, Cockram J, Rose GA,  
700 Barber T, Irigoyen J, Horsnell R, Pumfrey C, Winnie E, Schacht J, Beauchêne K, Praud S,  
701 Greenland A, Balding D, Mackay IJ (2014) Applying association mapping and genomic  
702 selection to the dissection of key traits in elite European wheat. *Theor Appl Genet* 127:  
703 2619-2633.
- 704 2. Cadalen T, Sourdille P, Charmet G, Tixier MH, Gay G, Boeuf C, Bernard S, Leroy P,  
705 Bernard M (1998) Molecular markers linked to genes affecting plant height in wheat using a  
706 doubled-haploid population. *Theor Appl Genet* 96: 933-940.
- 707 3. Cheng H, Liu J, Wen J, Nie X, Xu L, Chen N, Li Z, Wang Q, Zheng Z, Li M, Cui L, Liu Z,  
708 Bian J, Wang Z, Xu S, Yang Q, Appels R, Han D, Song W, Sun Q, Jiang Y (2019) Frequent  
709 intra- and inter-species introgression shapes the landscape of genetic variation in bread  
710 wheat. *Genome Biol* 20: 136.
- 711 4. Covarrubias-Pazaran G (2016) Genome-assisted prediction of quantitative traits using the R  
712 package *sommer*. *PLoS One* 11: e0156744.
- 713 5. Decker JE, Vasco DA, McKay SD, McClure MC, Rolf MM, Kim J, Northcutt SL, Bauck S,  
714 Woodward BW, Schnabel RD, Taylor JF (2012) A novel analytical method, Birth Date  
715 Selection Mapping, detects response of the Angus (*Bos Taurus*) genome to selection on  
716 complex traits. *BMC Genomics* 13: 606.
- 717 6. Devlin B, Roeder K (1999) Genomic control for association studies. *Biometrics* 55: 997-  
718 1004.
- 719 7. Elshire RJ, Glaubitz JC, Sun Q, Poland JA, Kawamoto K, Buckler ES, Mitchell SE (2011) A  
720 robust, simple genotyping-by-sequencing (GBS) approach for high diversity species. *PLoS*  
721 *One* 6: e19379.

- 722 8. Endelman JB (2011) Ridge regression and other kernels for genomic selection with R  
723 package rrBLUP. *Plant Genome* 4: doi.org/10.3835/plantgenome2011.08.0024.
- 724 9. Falconer DS, Mackay TFC (1996) *Introduction to quantitative genetics*. Prentice Hall, Essex,  
725 England.
- 726 10. Fradgley N, Gardner KA, Cockram J, Elderfield J, Hickey JM, Howell P, Jackson R, Mackay  
727 IJ (2019) A large-scale pedigree resource of wheat reveals evidence for adaptation and  
728 selection by breeders. *PLoS Biol* 17: e3000071.
- 729 11. Friedman J, Hastie T, Tibshirani R (2010) Regularization paths for generalized linear models  
730 via coordinate descent. *J Stat Softw* 33: 1-22.
- 731 12. Gaynor RC, Gorjanc G, Hickey JM (2021) AlphaSimR: an R package for breeding program  
732 simulations. *G3: Genes, Genomes, Genetics* 11: jkaa017.
- 733 13. Gill BS, Friebe BR, White FF (2011) Alien introgressions represent a rich source of genes  
734 for crop improvement. *Proc Natl Acad Sci USA* 108: 7657-7658.
- 735 14. Gorjanc G, Jenko J, Hearne SJ, Hickey JM (2016) Initiating maize pre-breeding programs  
736 using genomic selection to harness polygenic variation from landrace populations. *BMC*  
737 *Genomics* 17: 30.
- 738 15. Gorroochurn P, Heiman GA, Hodge SE, Greenberg DA (2006) Centralizing the non-central  
739 chi-square: a new method to correct for population stratification in genetic case-control  
740 association studies. *Genet Epidemiol* 30: 277-289.
- 741 16. Griffiths S, Simmonds J, Leverington M, Wang Y, Fish L, Sayers L, Alibert L, Orford S,  
742 Wingen L, Herry L, Faure S, Laurie D, Bilham L, Snape J (2010) Meta-QTL analysis of the  
743 genetic control of crop height in elite European winter wheat germplasm. *Mol Breed* 29: 159-  
744 171.
- 745 17. Haque MA, Martinek P, Watanabe N, Kuboyama T (2011) Genetic mapping of gibberellic  
746 acid-sensitive genes for semi-dwarfism in durum wheat. *Cereal Res Commun* 39: 171-178.

- 747 18. Hickey JM, Chiurugwi T, Mackay I, Powell W, Implementing Genomic Selection in CGIAR  
748 Breeding Programs Workshop Participants (2017) Genomic prediction unifies animal and  
749 plant breeding programs to form platforms for biological discovery. *Nat Genet* 49: 1297-  
750 1303.
- 751 19. Hoad SP (2010) Evaluation of new varieties for sustainable cereal production in Europe.  
752 Farmers Club Charitable Trust. [https://pure.sruc.ac.uk/en/publications/e0ac4808-c755-4f70-](https://pure.sruc.ac.uk/en/publications/e0ac4808-c755-4f70-a224-4bc536106813)  
753 [a224-4bc536106813](https://pure.sruc.ac.uk/en/publications/e0ac4808-c755-4f70-a224-4bc536106813). Accessed 25 November 2021.
- 754 20. Hoerl AE, Kennard RW (1970) Ridge regression: biased estimation for nonorthogonal  
755 problems. *Technometrics* 12: 55-67.
- 756 21. Jiang W, Zhang X, Li S, Song S, Zhao H (2021) Correcting statistical bias in correlation-  
757 based kinship estimators. *Biorxiv*. doi.org/10.1101/2021.01.13.426515
- 758 22. Johnsson M (2018) Integrating selection mapping with genetic mapping and functional  
759 genomics. *Front Genet* 9: 603.
- 760 23. Johnsson M, Gaynor RC, Jenko J, Gorjanc G, de Koning DJ, Hickey JM (2019) Removal of  
761 alleles by genome editing (RAGE) against deleterious load. *Genet Sel Evol* 51: 14.
- 762 24. Ladejobi O, Mackay IJ, Poland J, Praud S, Hibberd JM, Bentley AR (2019) Reference  
763 genome anchoring of high-density markers for association mapping and genomic prediction  
764 in European winter wheat. *Front Plant Sci* 10: 1278.
- 765 25. Lande R, Arnold SJ (1983) The measurement of selection on correlated characters.  
766 *Evolution* 37: 1210-1226.
- 767 26. Li J, Chen G-B, Rasheed A, Li D, Sonder K, Espinosas CZ, Wang JK, Costich DE, Schnable  
768 PS, Hearne SJ, Li H (2020) Identifying loci with breeding potential across temperate and  
769 tropical adaptation via EigenGWAS and EnvGWAS. *Mol Ecol* 28: 3544-3560.
- 770 27. Looseley ME, Ramsay L, Bull H, Swanston JS, Shaw PD, Macaulay M, Booth A, Russell JR,  
771 Waugh R, Thomas WTB (2020) Association mapping of malting quality traits in UK spring  
772 and winter barley cultivar collections. *Theor Appl Genet* 133: 2567-2582.



- 773 28. Mackay I, Horwell A, Garner J, White J, McKee J, Philpott H (2011) Reanalyses of the  
774 historical series of UK variety trials to quantify the contributions of genetic and  
775 environmental factors to trends and variability in yield over time. *Theor Appl Genet* 122: 225-  
776 238.
- 777 29. Marchal C, Zhang J, Zhang P, Fenwick P, Steuernagel B, Adamski NM, Boyd L, McIntosh R,  
778 Wulff BBH, Berry S, Lagudah E, Uauy C (2018) BED-domain-containing immune receptors  
779 confer diverse resistance spectra to yellow rust. *Nat Plants* 4: 662-668.
- 780 30. Martynov SP, Dobrotvorskaya TV, Krupnov VA (2018) Analysis of the distribution of *Triticum*  
781 *timopheevii* Zhuk. Genetic material in common wheat varieties (*Triticum aestivum* L.). *Russ*  
782 *J Genet* 54: 166-175.
- 783 31. Meuwissen TH, Hayes BJ, Goddard ME (2001) Prediction of total genetic value using  
784 genome-wide dense marker maps. *Genetics* 157: 1819-1829.
- 785 32. Mo Y, Vanzetti LS, Hale I, Spagnolo EJ, Guidobaldi F, Al-Oboudi J, Odle N, Pearce S,  
786 Helguera M, Dubcovsky J (2018) Identification and characterization of *Rht25*, a locus on  
787 chromosome arm 6AS affecting wheat plant height, heading time, and spike development.  
788 *Theor Appl Genet* 131: 2021-2035.
- 789 33. Mohler V, Lukman R, Ortiz-Islas S, William M, Worland AJ, van Beem J, Wenzel G (2004)  
790 Genetic and physical mapping of photoperiod insensitive gene *Ppd-B1* in common wheat.  
791 *Euphytica* 138: 33-40.
- 792 34. Ochoa A, Storey JD (2021) Estimating  $F_{ST}$  and kinship for arbitrary population structures.  
793 *PLoS Genet.* 17: e1009241.
- 794 35. Pearce S, Saville R, Vaughan SP, Chandler PM, Wilhelm EP, Sparks CA, Al-Kaff N, Korolev  
795 A, Boulton MI, Phillips AL, Hedden P, Nicholson P, Thomas SG (2011) Molecular  
796 characterization of *Rht-1* dwarfing genes in hexaploid wheat. *Plant Physiol* 157: 1820-1831.
- 797 36. Prentice RL, Pyke R (1979) Logistic disease incidence models and case-control studies.  
798 *Biometrika* 66: 403-411.

- 799 37. R Core Team (2021) R: A language and environment for statistical computing. R Foundation  
800 for Statistical Computing, Vienna.
- 801 38. Reif JC, Zhang P, Dreisigacker S, Warburton ML, van Ginkel M, Hoisington D, Bohn M,  
802 Melchinger AE (2005) Wheat genetic diversity trends during domestication and breeding.  
803 *Theor Appl Genet* 110: 859-864.
- 804 39. Rhoné B, Raquin AL, Goldringer I (2007) Strong linkage disequilibrium near the selected  
805 *Yr17* resistance gene in a wheat experimental population. *Theor Appl Genet* 114: 787-802.
- 806 40. Robert O, Abelard C, Dedryver F (1999) Identification of molecular markers for the detection  
807 of the yellow rust resistance gene *Yr17* in wheat. *Mol Breed* 5: 167-175.
- 808 41. Rosyara UR, de Jong WS, Douches DS, Endelman JB (2016) Software for genome-wide  
809 association studies in autopolyploids and its application to potato. *Plant Genome* 9: 1-10.
- 810 42. Rowan TN, Durbin HJ, Seabury CM, Schnabel RD, Decker JE (2021) Powerful detection of  
811 polygenic selection and evidence of environmental adaptation in US beef cattle. *PLoS*  
812 *Genet* 17: e1009652.
- 813 43. Santantonio N, Jannink J-L, Sorrells M (2019) A low resolution epistasis mapping approach  
814 to identify chromosome arm interactions in allohexaploid wheat. *G3: Genes, Genomes,*  
815 *Genetics* 9: 675-684.
- 816 44. Schork NJ (2001) Genome partitioning and whole-genome analysis. *Adv Genet* 42: 299-  
817 322.
- 818 45. Scott MF, Fradgley N, Bentley AR, Brabbs T, Corke F, Gardner KA, Horsnell R, Howell P,  
819 Ladejobi O, Mackay IJ, Mott R, Cockram J (2021) Limited haplotype diversity underlies  
820 polygenic trait architecture across 70 years of wheat breeding. *Genome Biol* 22: 137.
- 821 46. Sharma R, Cockram J, Gardner KA, Russell J, Ramsay L, Thomas WTB, O'Sullivan DM,  
822 Powell W, Mackay IJ (2021) Trends of genetic changes uncovered by Env- and Eigen-  
823 GWAS in wheat and barley. *Theor Appl Genet*. doi.org/10.1007/s00122-021-03991-z

- 824 47. Shorinola O, Simmonds J, Wingen LU, Gardner K, Uauy C (2021) Trend, population  
825 structure and trait mapping from 15 years of national varietal trials of UK winter wheat.  
826 *Biorxiv*. doi.org/10.1101/2021.05.17.444481
- 827 48. Singh S, Jighly A, Sehgal D, Burgueño J, Joukhadar R, Singh SK, Sharma A, Vikram P,  
828 Sansaloni CP, Govindan V, Bhavani S, Randhawa M, Solis-Moya E, Singh S, Pardo N, Arif  
829 MAR, Laghari KA, Basandrai D, Shokat S, Chaudhary HK, Saeed NA, Basandrai AK,  
830 Ledesma-Ramírez L, Sohu VS, Imtiaz M, Sial MA, Wenzl P, Singh GP, Bains NS (2021)  
831 Direct introgression of untapped diversity into elite wheat lines. *Nat Food* 2: 819-827.
- 832 49. Su Z, Hao C, Wang L, Dong Y, Zhang X (2011) Identification and development of a  
833 functional marker of *TaGW2* associated with grain weight in bread wheat (*Triticum aestivum*  
834 L.) *Theor Appl Genet* 122: 211-223.
- 835 50. Tadesse W, Sanchez-Garcia M, Assefa SG, Amri A, Bishaw Z, Ogonnaya FC, Baum M  
836 (2019) Genetic gains in wheat breeding and its role in feeding the world. *Crop Breed Genet*  
837 *Genom* 1: e190005.
- 838 51. Tibshirani R (1996) Regression shrinkage and selection via the lasso. *J R Stat Soc* 58: 267-  
839 288.
- 840 52. Tiwari C, Wallwork H, Arun B, Mishra VK, Velu G, Stangoulis J, Kumar U, Joshi AK (2016)  
841 Molecular mapping of quantitative trait loci for zinc, iron and protein content in the grains of  
842 hexaploidy wheat. *Euphytica* 207: 563-570.
- 843 53. Tsilo TJ, Jin Y, Anderson JA (2008) Diagnostic microsatellite markers for the detection of  
844 stem rust resistance gene *Sr36* in diverse genetic backgrounds of wheat. *Crop Sci* 48: 253-  
845 261.
- 846 54. Visscher PM, Macgregor S, Benyamin B, Zhu G, Gordon S, Medland S, Hill WG, Hottenga  
847 J-J, Willemsen G, Boomsma DI, Liu Y-Z, Deng H-W, Montgomery GW, Martin NG (2007)  
848 Genome partitioning of genetic variation for height from 11,214 sibling pairs. *Am J Hum*  
849 *Genet* 81: 1104-1110.

- 850 55. Voss-Fels KP, Cooper M, Hayes BJ (2018) Accelerating crop genetic gains with genomic  
851 selection. *Theor Appl Genet* 132: 669-686.
- 852 56. Walsh B, Lynch M. Evolution and selection of quantitative traits. Oxford University Press,  
853 Oxford (2018).
- 854 57. Wang S, Wong D, Forrest K, Allen A, Chao S, Huang BE, Maccaferri M, Salvi S, Milner SG,  
855 Cattivelli L, Mastrangelo AM, Whan A, Stephen S, Barker G, Wieseke R, Plieske J, IWGSC,  
856 Lillemo M, Mather D, Appels R, Dolferus R, Brown-Guedira G, Korol A, Akhunova AR,  
857 Feuillet C, Salse J, Morgante M, Pozniak C, Luo M-C, Dvorak J, Morrell M, Dubcovsky J,  
858 Ganal M, Tuberosa R, Lawley C, Mikoulitch I, Cavanagh C, Edwards KJ, Hayden M,  
859 Akhunov E (2014) Characterization of polyploid wheat genomic diversity using a high-  
860 density 90,000 single nucleotide polymorphism array. *Plant Biotechnol J* 12: 787-796.
- 861 58. Würschum T, Langer SM, Longin CFH, Tucker MR, Leiser WL (2017) A modern Green  
862 Revolution gene for reduced height in wheat. *Plant J* 92: 892-903.
- 863 59. Yang CJ, Sharma R, Gorjanc G, Hearne S, Powell W, Mackay I (2020) Origin specific  
864 genomic selection: a simple process to optimize the favorable contribution of parents to  
865 progeny. *G3: Genes, Genomes, Genetics* 10: 2445-2455.
- 866 60. Yang Y, Aduragbemi A, Wei D, Chai Y, Zheng J, Qiao P, Cui C, Lu S, Chen L, Hu Y-G  
867 (2021) Large-scale integration of meta-QTL and genome-wide association study discovers  
868 the genomic regions and candidate genes for yield and yield-related traits in bread wheat.  
869 Research Square. [doi.org/10.21203/rs.3.rs-342038/v1](https://doi.org/10.21203/rs.3.rs-342038/v1)
- 870 61. Yu J, Pressoir G, Briggs WH, Bi IV, Yamasaki M, Doebley JF, McMullen MD, Gaut BS,  
871 Nielsen DM, Holland JB, Kresovich S, Buckler ES (2006) A unified mixed-model method for  
872 association mapping that accounts for multiple levels of relatedness. *Nat Genet* 38: 203-  
873 208.

874 **Tables and Figures**

875 **Table 1. Genomic positions of 22 RALLY QSLs in the TG panel.**

876 The IWGSC RefSeq v1.0 physical positions of the peaks and LD boundaries are shown, along  
 877 with the  $-\log_{10}P$  scores associated with the peaks and overlapping QSLs/QTLs from RALLY in  
 878 WAGTAIL panel and GWAS in TG panel (Ladejobi et al. 2019).

| QSL | Chr | Position (bp) |             |             | $-\log_{10}P$ | Overlapping QSLs/QTLs |         |
|-----|-----|---------------|-------------|-------------|---------------|-----------------------|---------|
|     |     | Peak          | Start       | End         |               | WAGTAIL               | GWAS    |
| 1   | 1A  | 40,535,368    | 36,797,100  | 42,151,448  | 6.964         | 2                     | 1       |
| 2   | 1A  | 138,028,803   | 105,888,613 | 395,485,807 | 6.419         | 2                     | 0       |
| 3   | 1B  | 274,240,580   | 52,771,404  | 572,972,254 | 8.726         | 3                     | 0       |
| 4   | 2A  | 19,049,803    | 502,328     | 36,134,675  | 7.022         | 5                     | 7       |
| 5   | 2A  | 56,159,824    | 56,159,824  | 115,431,692 | 7.951         | 6                     | 0       |
| 6   | 2B  | 230,348,363   | 10,888,962  | 785,614,875 | 10.634        | 9,10                  | 10      |
| 7   | 3A  | 544,972,180   | 488,305,885 | 574,586,196 | 6.965         | 13                    | 19      |
| 8   | 3B  | 20,035,143    | 19,086,765  | 31,366,713  | 6.011         | 0                     | 0       |
| 9   | 3B  | 829,382,536   | 813,333,316 | 829,954,621 | 9.170         | 0                     | 0       |
| 10  | 4A  | 690,425,855   | 507,739,498 | 695,893,542 | 7.199         | 14                    | 22      |
| 11  | 4B  | 570,537,081   | 507,170,910 | 593,797,914 | 5.934         | 0                     | 26,27   |
| 12  | 5A  | 59,666,472    | 31,088,127  | 449,788,941 | 7.816         | 16                    | 28      |
| 13  | 5B  | 703,651,326   | 681,349,598 | 703,858,824 | 5.923         | 0                     | 0       |
| 14  | 5D  | 69,776,655    | 43,408,942  | 233,674,405 | 6.148         | 0                     | 0       |
| 15  | 6A  | 2,160,664     | 684,328     | 5,113,555   | 7.259         | 0                     | 32      |
| 16  | 6A  | 89,355,276    | 61,817,777  | 545,399,189 | 6.538         | 18                    | 33 - 37 |
| 17  | 6A  | 609,106,971   | 596,590,923 | 617,255,792 | 6.468         | 0                     | 38      |
| 18  | 7A  | 612,599,663   | 610,209,166 | 612,599,663 | 6.272         | 0                     | 0       |
| 19  | 7A  | 681,696,004   | 669,820,116 | 695,003,193 | 6.632         | 0                     | 0       |
| 20  | 7B  | 3,693,110     | 3,366,069   | 4,826,131   | 6.438         | 0                     | 0       |
| 21  | 7B  | 43,221,041    | 40,293,564  | 58,886,832  | 6.503         | 0                     | 48      |
| 22  | 7B  | 704,838,082   | 698,229,993 | 707,941,517 | 7.952         | 0                     | 49      |

879

880

881 **Table 2. Local heritabilities associated with 22 RALLY QSLs.**

882 Local heritabilities less than 0.001 are not shown.

| QSL    | FT    | LODG  | YLD   | HT    | PROT  | WK    | AWNS  | SPWT  | TGW   | EM2   | TILL  | MAT   |
|--------|-------|-------|-------|-------|-------|-------|-------|-------|-------|-------|-------|-------|
| 1      | -     | -     | -     | 0.054 | 0.048 | 0.051 | -     | -     | -     | 0.005 | -     | -     |
| 2      | -     | -     | 0.007 | 0.068 | 0.105 | -     | -     | -     | 0.003 | 0.043 | -     | -     |
| 3      | 0.084 | -     | 0.006 | -     | 0.014 | -     | -     | -     | -     | 0.002 | 0.000 | 0.060 |
| 4      | -     | -     | -     | -     | -     | -     | 0.001 | -     | -     | -     | 0.016 | -     |
| 5      | -     | 0.009 | -     | 0.002 | -     | -     | -     | -     | -     | -     | -     | -     |
| 6      | -     | -     | 0.009 | -     | -     | 0.003 | -     | -     | 0.009 | -     | -     | 0.037 |
| 7      | -     | -     | -     | -     | -     | -     | 0.014 | -     | 0.055 | -     | 0.009 | -     |
| 8      | 0.005 | -     | -     | -     | -     | -     | -     | 0.020 | -     | -     | -     | -     |
| 9      | -     | -     | -     | -     | 0.002 | -     | 0.004 | -     | -     | -     | 0.006 | -     |
| 10     | 0.010 | 0.000 | -     | -     | -     | 0.002 | 0.003 | 0.008 | 0.090 | -     | 0.012 | 0.019 |
| 11     | -     | 0.040 | 0.036 | -     | 0.012 | 0.002 | 0.011 | 0.005 | 0.005 | -     | -     | -     |
| 12     | -     | -     | 0.003 | -     | -     | 0.005 | 0.011 | 0.075 | -     | 0.003 | -     | -     |
| 13     | -     | -     | 0.006 | -     | -     | 0.049 | -     | -     | 0.002 | -     | -     | -     |
| 14     | 0.069 | -     | 0.019 | -     | 0.018 | 0.000 | -     | -     | -     | -     | -     | 0.006 |
| 15     | 0.011 | -     | -     | -     | -     | 0.004 | 0.018 | -     | 0.005 | 0.014 | -     | -     |
| 16     | -     | 0.086 | 0.045 | 0.127 | 0.071 | -     | -     | 0.013 | 0.012 | 0.021 | -     | 0.006 |
| 17     | 0.072 | -     | 0.001 | -     | 0.001 | 0.016 | -     | -     | 0.002 | -     | 0.013 | 0.069 |
| 18     | -     | -     | 0.006 | -     | -     | -     | -     | -     | 0.003 | -     | -     | -     |
| 19     | -     | 0.020 | 0.005 | -     | -     | -     | 0.011 | -     | 0.028 | 0.001 | -     | -     |
| 20     | -     | -     | 0.008 | 0.089 | 0.004 | 0.000 | -     | -     | -     | 0.065 | -     | -     |
| 21     | -     | 0.039 | -     | 0.041 | -     | -     | -     | 0.009 | 0.025 | -     | -     | -     |
| 22     | 0.010 | -     | 0.001 | 0.021 | -     | -     | -     | -     | 0.016 | -     | 0.013 | -     |
| Total  | 0.260 | 0.194 | 0.153 | 0.402 | 0.275 | 0.133 | 0.074 | 0.129 | 0.254 | 0.154 | 0.068 | 0.197 |
| Others | 0.284 | 0.123 | 0.160 | 0.223 | 0.205 | 0.220 | 0.583 | 0.156 | 0.050 | 0.216 | 0.051 | 0.179 |

883

884 **Table 3. Counts of pairwise LASSO effects for alleles that are increasing over time.**

885 For each allele with increasing frequency over time, it is classified into pairs of traits for which  
886 the allele has an increasing effect on both traits (+/+), a decreasing effect on both traits (-/-) or  
887 antagonistic effects (+/- and -/+). The distribution for each pair of traits is tested with a  $\chi^2_{df=1}$   
888 contingency table where the significant threshold is set to  $-\log_{10}p = 3.121$  (equivalent to a  
889 Bonferroni-corrected threshold of  $p = 0.05$  for 66 possible pairs of traits). Only the significant  
890 trait pairs are shown here, and the full results are available in Table S7.

| trait pair | +/+ | +/- | -/+ | -/- | $-\log_{10}p$ |
|------------|-----|-----|-----|-----|---------------|
| FT/YLD     | 270 | 43  | 145 | 59  | 4.435         |
| FT/HT      | 112 | 201 | 22  | 182 | 9.352         |
| FT/WK      | 135 | 178 | 135 | 69  | 6.326         |
| FT/AWNS    | 139 | 174 | 140 | 64  | 6.959         |
| FT/MAT     | 268 | 45  | 57  | 147 | 38.908        |
| LODG/HT    | 75  | 56  | 59  | 327 | 20.083        |
| YLD/PROT   | 74  | 341 | 62  | 40  | 17.486        |
| YLD/MAT    | 280 | 135 | 45  | 57  | 4.687         |
| HT/PROT    | 56  | 78  | 80  | 303 | 5.408         |
| HT/WK      | 34  | 100 | 236 | 147 | 11.996        |
| HT/AWNS    | 49  | 85  | 230 | 153 | 5.361         |
| HT/MAT     | 102 | 32  | 223 | 160 | 3.474         |
| PROT/SPWT  | 82  | 54  | 138 | 243 | 5.742         |
| AWNS/MAT   | 145 | 134 | 180 | 58  | 7.317         |
| SPWT/EM2   | 148 | 72  | 122 | 175 | 8.195         |
| SPWT/MAT   | 119 | 101 | 206 | 91  | 3.269         |
| TGW/EM2    | 85  | 131 | 185 | 116 | 5.962         |
| EM2/MAT    | 149 | 121 | 176 | 71  | 3.643         |

891

892

893

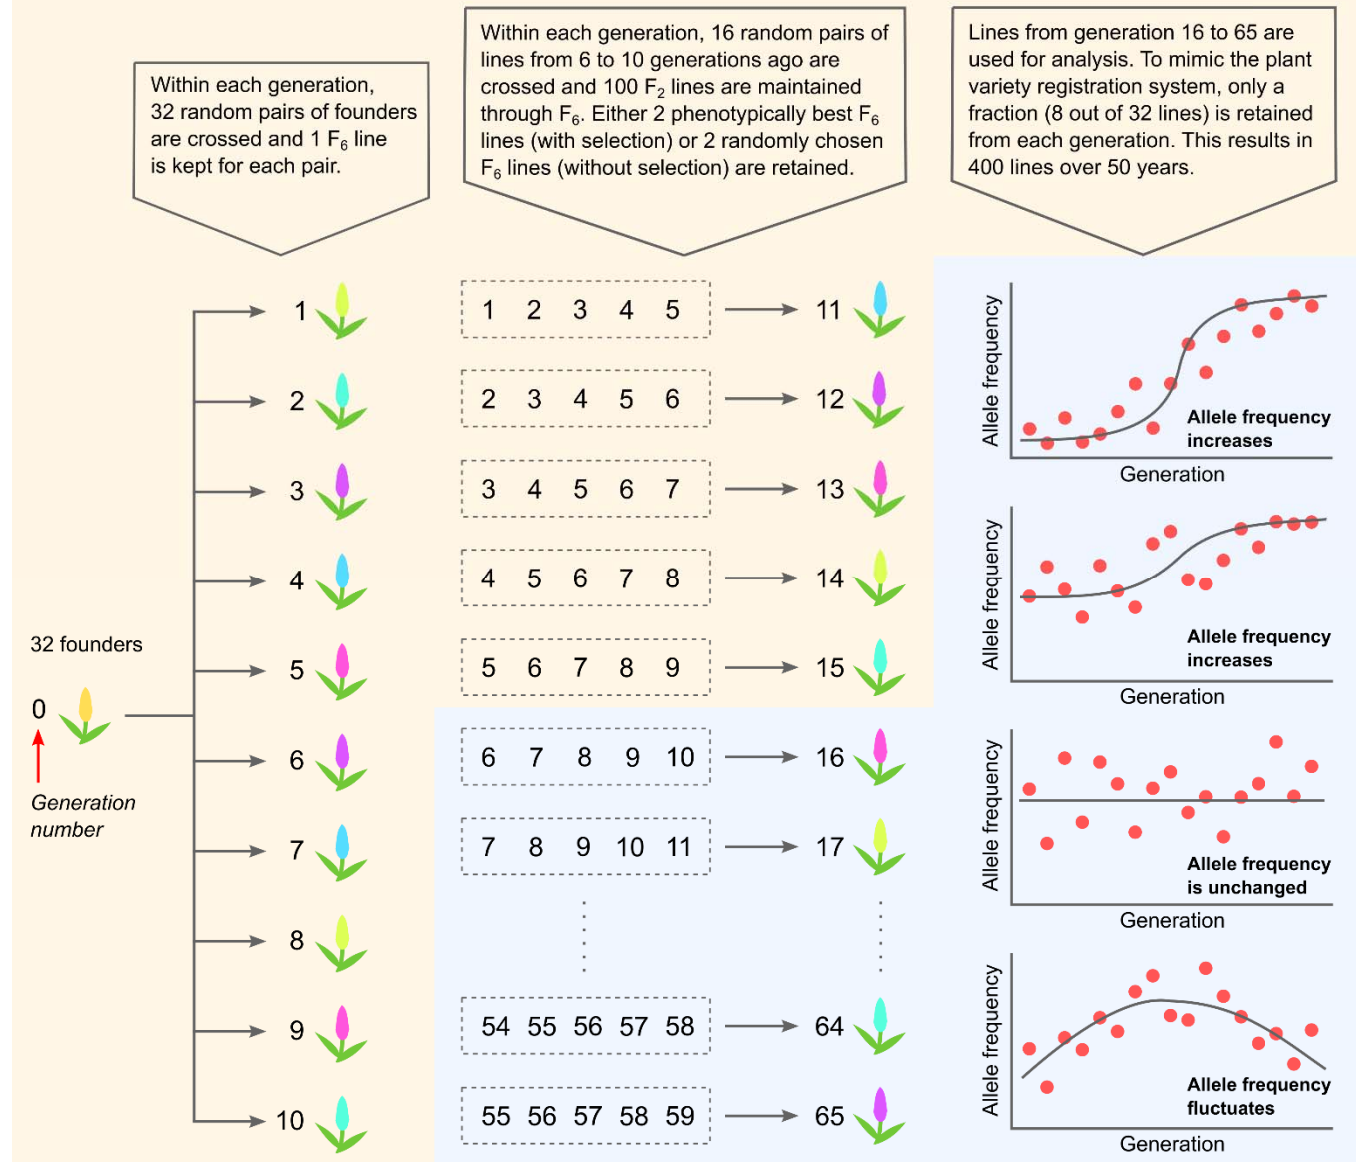

894

895 **Figure 1. Population simulation and changes in allele frequency over time.**

896 The simulated populations with and without selection are described in detail here. The first 15  
 897 generations were used as burn-ins and discarded. 8 varieties from each generation starting at  
 898 16 and ending at 65 were randomly chosen to create a population of 400 varieties that span  
 899 over 50 generations. Examples of how allele frequency changes over time are shown, with the  
 900 first two examples follows a logistic distribution and thus are more likely to be significant under  
 901 RALLY than the other two examples.

902



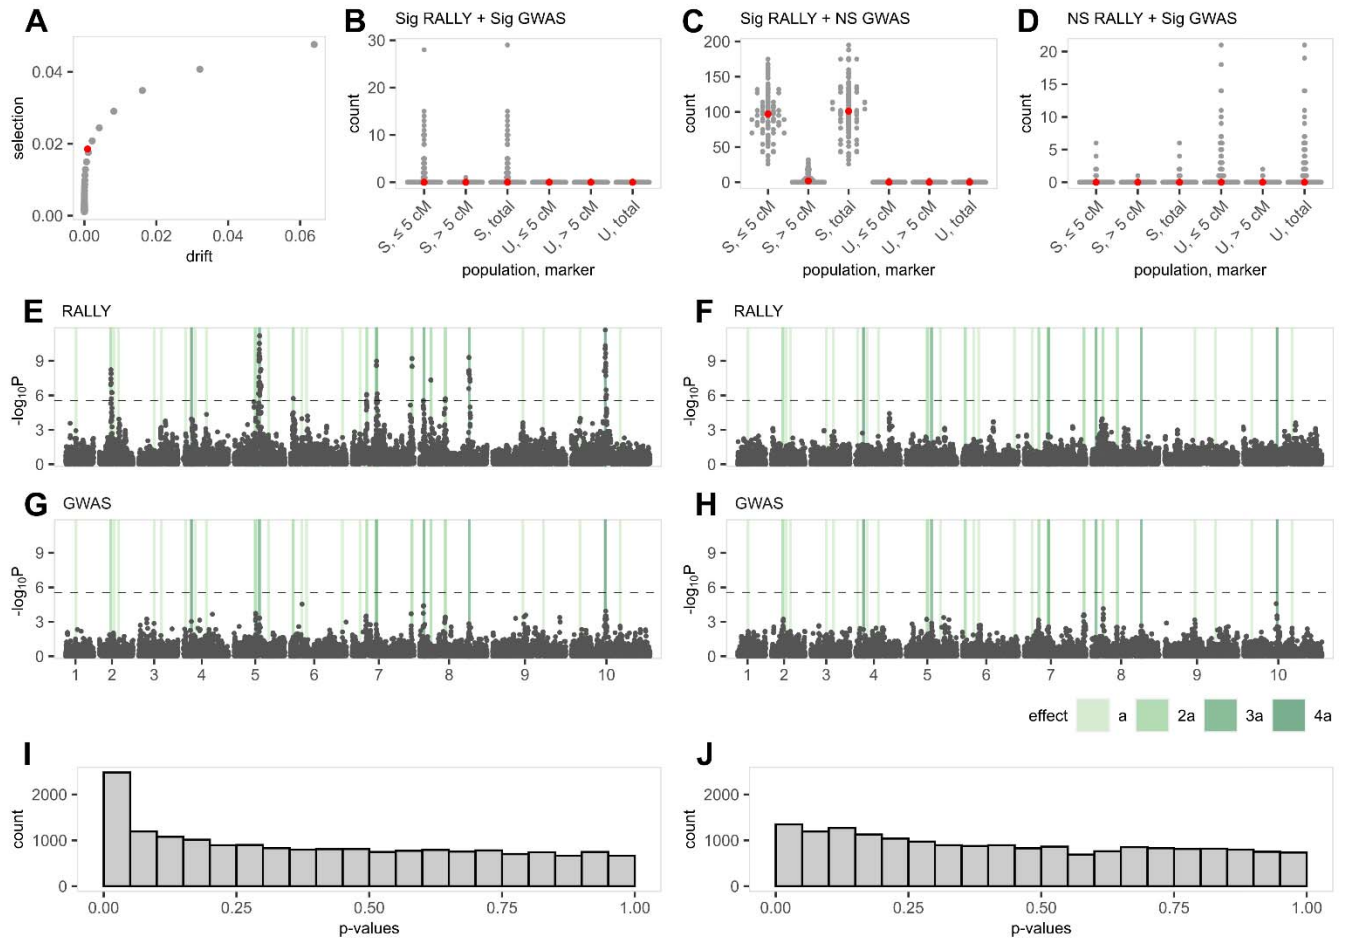

903

904 **Figure 2. RALLY and GWAS in simulated populations.**

905 Selected (S) and unselected (U) populations are simulated for 100 times and mapped for  
 906 QSLs/QTLs using RALLY and GWAS. **[A]** Significant proportions of total markers identified from  
 907 RALLY in S and U populations are calculated under various thresholds used in choosing null  
 908 markers for delta control (DC) and genomic control (GC). The red point is estimated without DC  
 909 and GC (uncorrected). Under the assumption that significant markers in U are due to drift alone  
 910 and in S are due to both drift and selection, the X-axis is shown as the proportions in U while the  
 911 Y-axis is shown as the differences in proportions between S and U. **[B – D]** Counts of significant  
 912 markers identified from RALLY and GWAS are shown according to their distance from QTLs in  
 913 both S and U populations. Medians are shown in red points. **[E]** Manhattan plot for RALLY in  
 914 one simulated S population. QTLs are highlighted in vertical bars according to their effect sizes.  
 915 **[F]** Manhattan plot for RALLY in one simulated U population. **[G]** Manhattan plot for GWAS in  
 916 one simulated S population. **[H]** Manhattan plot for GWAS in one simulated U population. **[I]**  
 917 Histogram of RALLY p-values for the same simulated S population. **[J]** Histogram of RALLY p-  
 918 values in the same simulated U population.

919

920

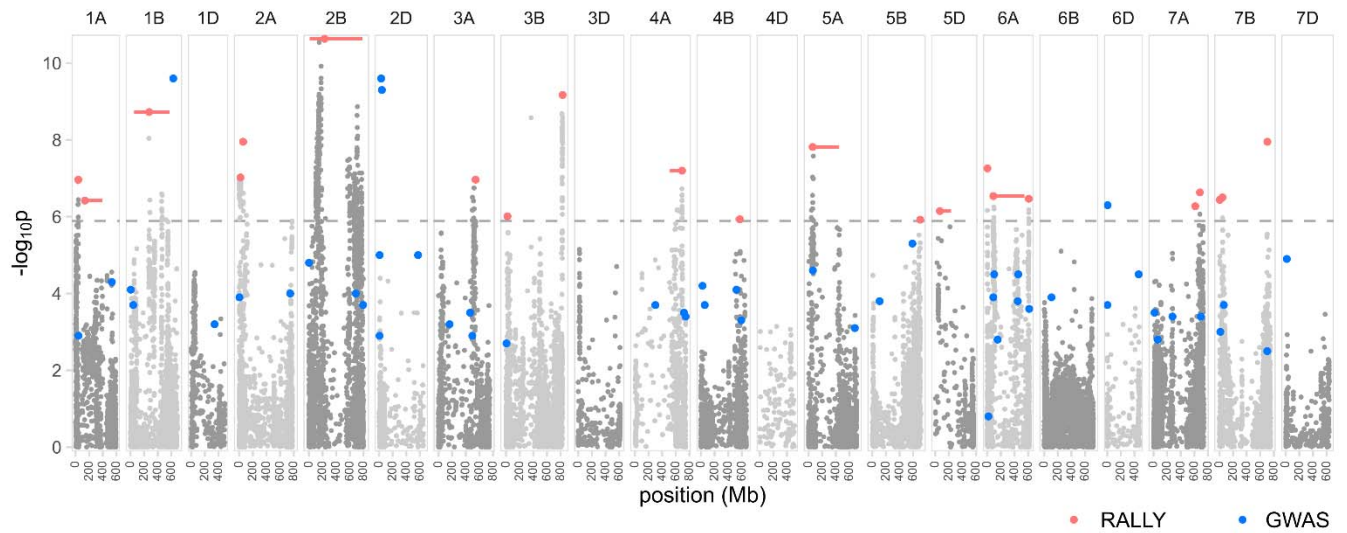

921

922 **Figure 3. Manhattan plot for RALLY results in the TG panel.**

923 RALLY peaks and their extents of LD are shown in red points and horizontal bars, respectively.

924 GWAS peaks from Ladejobi et al. (2019) are shown in blue points. The dashed horizontal line

925 represents the Bonferroni threshold of 0.05.

926

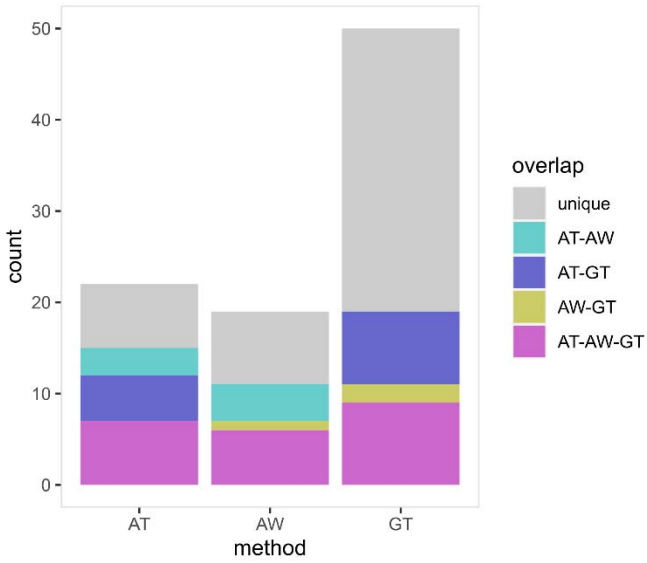

927

928 **Figure 4. QSL/QTL overlaps across different results.**

929 The number of overlapping QTLs among RALLY in TG panel (AT), RALLY in WAGTAIL panel  
930 (AW) and GWAS in TG panel (GT) are shown.

931

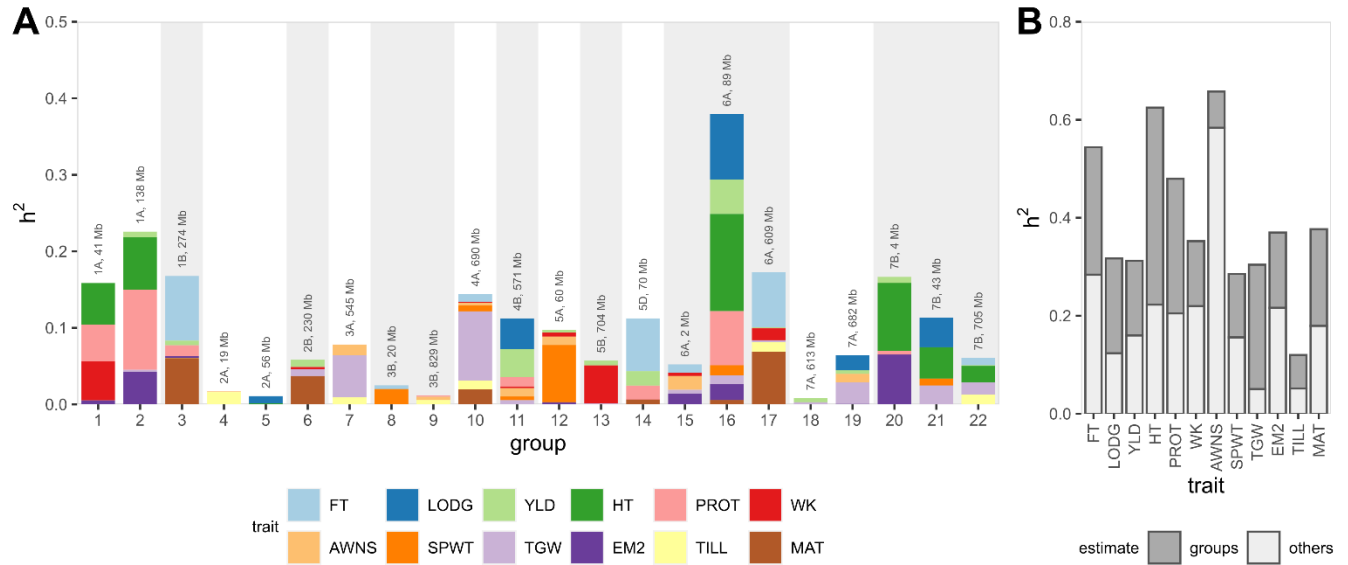

932

933 **Figure 5. Local heritabilities in RALLY QSL groups.**

934 **[A]** Local heritabilities for all 12 traits are shown as stacked bars for each RALLY QSL (defined  
 935 in [Table 1](#)). **[B]** Local heritabilities from 22 RALLY groups are summed and compared against  
 936 the heritabilities from other genomic markers.

937

938

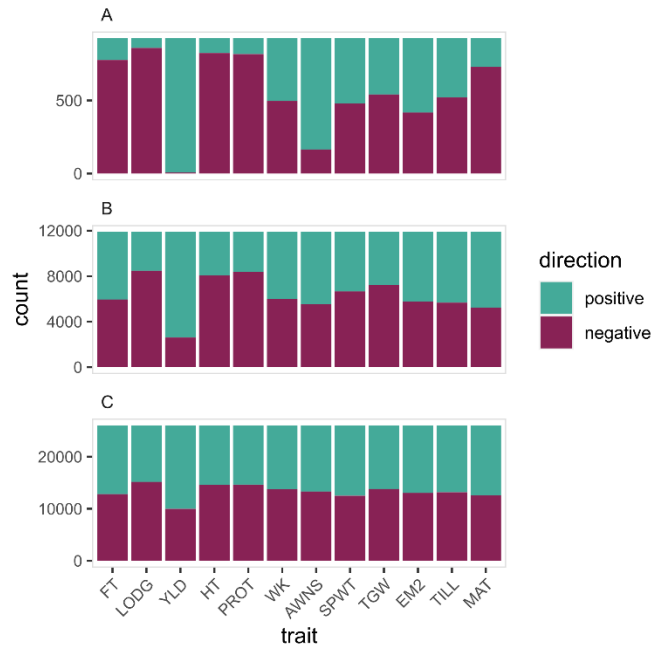

939

940 **Figure 6. Distributions of positive and negative RR effects in the increasing alleles.**

941 [A] Markers with RALLY P-values of lower than the Bonferroni corrected threshold. [B] Markers  
942 with RALLY P-values between 0.05 and the Bonferroni corrected threshold. [C] Markers with  
943 RALLY P-values of higher than 0.05.

944

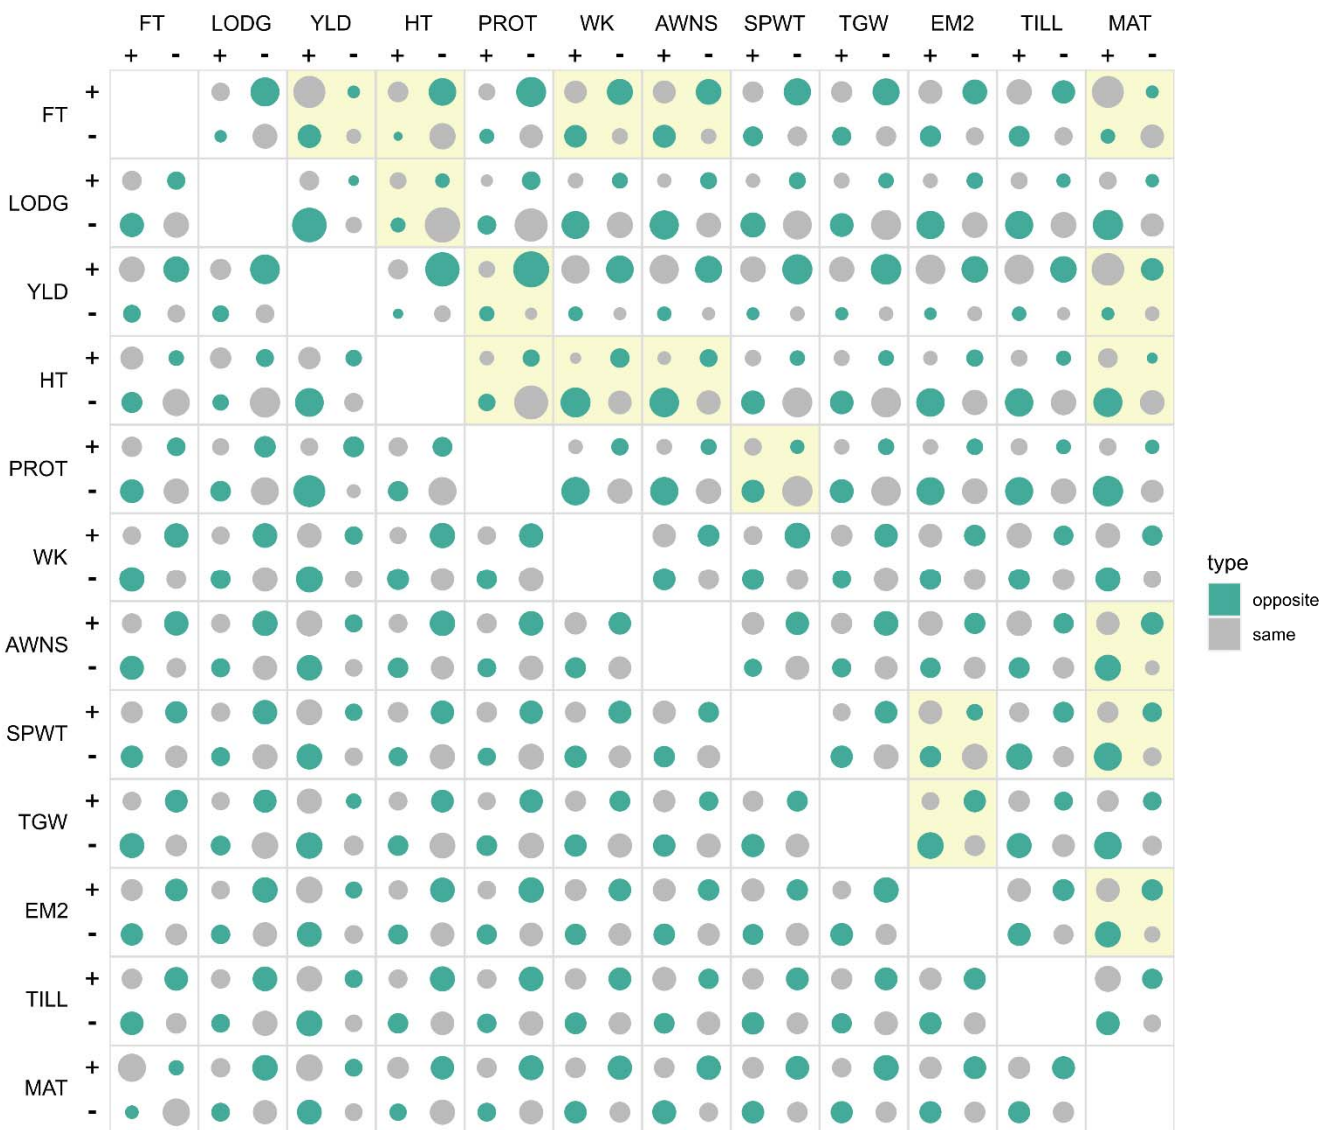

945

946 **Figure 7. Distribution of pairwise effects for alleles with increasing frequency over time.**

947 For each allele with increasing frequency over time, it is classified into pairs of traits for which  
 948 the allele has an increasing effect on both traits (+/+), a decreasing effect on both traits (-/-) or  
 949 antagonistic/opposite effects (+/- and -/+). The circle areas are scaled according to the marker  
 950 counts. The bottom left triangle represents the RR effects and the top right triangle represents  
 951 the LASSO effects. The distributions of the effect classes in each trait pair are tested using  
 952 in the LASSO effects and significant results (Bonferroni-corrected threshold of  $p = 0.05$ )  
 953 are highlighted in yellow. No test is performed in the RR effects because the marker effects in  
 954 RR are not independent.

955

956

957
